1 Full length title: **Nanoparticle coatings for controlled release of quercetin from an**  
2 **angioplasty balloon**

3

4 Short title: **Nanoparticle release of quercetin from an angioplasty balloon**

5

6 Ioana Craciun,<sup>a</sup> Carlos E. Astete,<sup>b</sup> Dorin Boldor,<sup>b</sup> Marilyn H. Jennings,<sup>c</sup> Jake D.

7 Gorman,<sup>b</sup> Cristina M. Sabliov,<sup>b\*</sup> and Tammy R. Dugas<sup>c\*</sup>

8 <sup>a</sup> Department of Clinical Sciences, Faculty of Veterinary Medicine, University of

9 Agricultural Sciences and Veterinary Medicine Cluj-Napoca, Calea Manastur 3-5,

10 400372 Cluj-Napoca, Romania

11 <sup>b</sup> Department of Biological and Agricultural Engineering, Louisiana State University and

12 the LSU AgCenter, Baton Rouge, LA 70803, USA

13 <sup>c</sup> Department of Comparative Biomedical Sciences, Louisiana State University School

14 of Veterinary Medicine, Baton Rouge, LA 70803, USA

15

16 \*Address correspondence to these authors at: [csabliov@agcenter.lsu.edu](mailto:csabliov@agcenter.lsu.edu), 01-225-

17 578-1055 and [tammydugas@lsu.edu](mailto:tammydugas@lsu.edu), 01-225-578-7581, ORCID ID: 0000-0002-4763-

18 0603.

19

20

21 **Abstract**

22

23 Peripheral artery disease (PAD) is a systemic vascular disease of the legs that results  
24 in a blockage of blood flow from the heart to the lower extremities. Now one of the  
25 most common causes of mortality in the U.S., the first line of therapy for PAD is to  
26 mechanically open the blockages using balloon angioplasty. Coating the balloons with  
27 antiproliferative agents can potentially reduce vessel re-narrowing, or restenosis after  
28 surgical intervention, but current drug-coated balloons releasing chemotherapy agents  
29 like paclitaxel have in some cases shown increased mortality long-term. Our aim was  
30 to design a novel drug-coated balloon using a polymeric nanodelivery system for a  
31 sustained release of polyphenols that reduce restenosis but with reduced toxicity  
32 compared to chemotherapy agents. Poly (lactic-co-glycolic acid) (PLGA)  
33 nanoparticles with entrapped quercetin, a dimethoxy quercetin (rhamnazin), as well as  
34 quercetin conjugated to PLGA, were developed. Balloon catheters were coated with  
35 polymeric nanoparticles using an ultrasonic method, and nanoparticle characteristics,  
36 drug loading, coating uniformity and drug release were determined. The adhesion of  
37 nanoparticles to vascular smooth muscle cells and the antiproliferative effect of nano-  
38 delivered polyphenols were also assessed. Of the nanoparticle systems tested, those  
39 with covalently attached quercetin provided the most sustained release over a 6-day  
40 period. Although these particles adhered to cells to a smaller extent compared to other  
41 nanoparticle formulations, their attachment was resistant to washing. These particles  
42 also exhibited the greatest anti-proliferative effect. In addition, their attachment was  
43 not altered when the cells were grown in calcifying conditions, and in PAD tissue  
44 calcification is typically a condition that impedes drug delivery. Moreover, the  
45 ultrasonic coating method generated a uniform balloon coating. The polymeric

46 nanoparticle system with covalently attached quercetin developed herein is thus  
47 proposed as a promising platform to reduce restenosis post-angioplasty.

## 48 **1. Introduction**

49 Peripheral artery disease (PAD) is a systemic atherosclerotic disease that affects  
50 approximately 202 million people worldwide. With over 8 million diagnoses, PAD is one  
51 of the most common causes of mortality in the United States (1-4). Moreover,  
52 atherosclerotic diseases like PAD are becoming a world-wide problem (5). PAD is  
53 characterized by debilitating atherosclerotic occlusion of arteries in the lower  
54 extremities, resulting in an obstruction of blood flow (1, 6). Though a disease of the  
55 extremities, left untreated, PAD can culminate in catastrophic consequences like  
56 stroke, myocardial infarction, and death (2, 7). The most common symptom among  
57 patients with PAD is intermittent claudication, but it is often asymptomatic, under-  
58 diagnosed and under-treated, resulting in a reduced functional capacity and quality of  
59 life. In its most severe form, the resulting limb ischemia can necessitate limb  
60 amputation (2-4). To treat lower extremity PAD, clinicians often revascularize the  
61 affected artery or arteries using an endovascular procedure known as angioplasty,  
62 achieved using balloon dilation and sometimes, placement of a stent (8-11).  
63 Angioplasty is a technique of mechanically widening a blood vessel that has been  
64 narrowed or obstructed due to atherosclerosis (12). In PAD, balloon angioplasty is  
65 favored over stenting due to the small diameter of the affected arteries and the  
66 preponderance of stent fractures occurring in clinical cases (13, 14). Balloon  
67 angioplasty allows slow vessel stretching to enlarge the lumen (12). Unfortunately, it  
68 also induces stretch and strain to the vessel wall, and the injury it imparts induces a  
69 series of cellular events culminating in the formation of a new lesion (15). Restenosis  
70 or vessel re-narrowing after implantation remains a complication of vascular

71 interventions (16). Early restenosis and neointimal hyperplasia within the stented  
72 vessels have been attributed to deep vascular injury, with fracture of the internal elastic  
73 lamina (17). Intimal hyperplasia includes inflammatory phenomena, migration, and  
74 proliferation of smooth muscle cells and also, extracellular matrix deposition (17).  
75 These events culminate in a thickened vessel wall that obstructs blood flow (15, 18).

76 Current protocols for the prevention and therapy of restenosis after  
77 angioplasty/stenting are based on sustained, antiproliferative drug release into the  
78 vessel wall (19). Drug-coated balloons (DCB) have recently emerged as a treatment  
79 for peripheral artery (19-22) and coronary in-stent restenosis (23). The concept of DCB  
80 therapy relies on healing of the vessel wall after a rapid release of drug locally but  
81 retention of the drug within the vessel wall long enough to impact deleterious cellular  
82 events occurring early after the procedure. DCBs require three fundamental elements:  
83 a semi-compliant angioplasty balloon, an antiproliferative drug and a drug carrier (23).  
84 DCB releasing the chemotherapy agent paclitaxel have been approved by the FDA.  
85 Paclitaxel is highly lipophilic and binds quickly and tightly to tissue, which results in  
86 rapid cellular uptake and long-term retention at the site of delivery. This treatment  
87 comes with major disadvantages such as: systemic toxicity (15, 24), the release of  
88 paclitaxel before arrival at the lesion site due to direct application of drug to the balloon  
89 surface (15, 24) and delayed re-endothelialization, as demonstrated by animal studies  
90 utilizing paclitaxel-eluting stents (25, 26). In addition, recent alerts issued by the FDA  
91 identified a late mortality signal in study subjects treated with paclitaxel-coated  
92 balloons. The relative risk for increased mortality at 5 years was 1.57 (95% confidence  
93 interval 1.16 – 2.13), which corresponds to a 57% relative increase in mortality in  
94 patients treated with paclitaxel-coated devices (27). Therefore, studies focused on  
95 controlled delivery of other anti-proliferative agents have evolved. Our own prior

96 research focused on two synergistic polyphenols - resveratrol and quercetin - and  
97 these studies demonstrated that the two have low toxicity and reduce vascular smooth  
98 muscle proliferation but promote re-endothelialization, both *in vitro* and *in vivo* (15, 28).  
99 We were also successful in developing a drug-eluting coating that successfully  
100 achieves slow release of resveratrol (i.e., over several days), but by comparison,  
101 release of quercetin was more rapid and less protracted (15).

102 Within this framework, the aim of this study was to develop polymeric nanoparticles  
103 (pNP) for quercetin delivery that were capable of a high entrapment, slow release of  
104 drug and antiproliferative activity. Poly (lactic-co-glycolic acid) (PLGA) nanoparticles  
105 with entrapped quercetin (pNP(eQ)), a dimethoxy quercetin (i.e., rhamnazin,  
106 designated pNP(eR)), as well as quercetin conjugated to PLGA (pNP(cQ)), were  
107 developed. Using an ultrasonic coating method, miniaturized balloon catheters were  
108 coated with pNP, and nanoparticle characteristics, drug loading, drug release, and  
109 efficacy in reducing vascular smooth muscle cell proliferation were assessed. With  
110 respect to the coated balloons, we also determined particle deposition on the balloon  
111 surface, assessed as total pNP and drug loading, as well as coating uniformity. We  
112 aimed to achieve uniformly coated balloons, with the particles firmly adhered. Our  
113 overarching project goal is to achieve minimal loss of drug from the balloon surface  
114 during transit to the lesioned area, but upon inflation within the lesioned artery, the  
115 particles transfer and attach firmly to the vessel wall, where the coating begins  
116 releasing polyphenols. As such, we aim to achieve a controlled and localized  
117 administration of the active substance in the affected area.

118

119 A secondary aim of our design was to enable pNP adhesion to calcified lesions.  
120 Vascular calcification is a common occurrence in PAD and compared to coronary

121 artery disease, can be extensive (29). The accumulation of calcium and phosphate in  
122 the intimal and medial layers of the vessel are typical of patients with PAD, particularly  
123 those with chronic kidney disease and diabetes mellitus (30). Calcification is a key  
124 contributor to poorer outcomes after angioplasty, as it leads to altered compliance,  
125 flow-limiting dissections and acute vessel recoil (31). Moreover, late lumen loss after  
126 paclitaxel-coated balloon therapy was shown correlated with circumferential  
127 calcification (32), and hypotheses are that such outcomes are due to an inability of the  
128 calcified lesion to absorb paclitaxel. Thus, in some experiments, we tested whether  
129 our pNP coating was capable of strong adhesion to cells in which calcium accumulation  
130 was induced experimentally.

131

## 132 **2. Materials and methods**

### 133 **2.1. Materials**

134 The following materials were obtained from Sigma-Aldrich (St. Louis, MO): Resomer  
135 RG504H poly (D, L-lactide-co-glycolide), PLGA 50:50 (molecular weight 38,000-  
136 54,000), acetone and poly (vinyl alcohol) (PVA 31,000-50,000; 87-89% hydrolysed),  
137 quercetin and rhamnazin. PLGA covalently modified with quercetin was synthesized  
138 in the laboratory. Analytical grade chemicals and reagents were used for this study.

139

### 140 **2.2. Conjugation of PLGA with quercetin**

141 The coupling of quercetin to PLGA was based on an acylation reaction. The first step  
142 was PLGA activation. Briefly, 2 g of PLGA was dissolved in 50 mL DCM at room  
143 temperature in a 3-neck round bottom flask. A bubbler bottle with 1 M sodium  
144 hydroxide NaOH was required to neutralize HCl produced during the reaction under  
145 nitrogen. After complete dissolution of PLGA at room temperature, 10 eq. of oxalyl

146 chloride was added dropwise with a glass syringe, along with 3 mL of DMF. The  
147 reaction was performed at room temperature with mild stirring for 5 hours. Next, the  
148 solution was concentrated with a Buchi R-300 Rotavapor (Buchi Corporation, New  
149 Castle, DE). The activated PLGA polymer was precipitated by addition of 200-300 mL  
150 of ethyl ether. The white precipitate was washed at least three times with ethyl ether  
151 to remove impurities. The solids were dried overnight under high vacuum. The second  
152 reaction was performed by dissolution of 1 g of dry PLGA-Cl in 25 mL of DMSO, which  
153 was added dropwise to 35 mg of quercetin dissolved in 20 mL of DMSO. The reaction  
154 was performed overnight at room temperature under nitrogen. The PLGA-quercetin  
155 polymer was precipitated by addition of 150 mL of ethyl ether; the precipitation was  
156 repeated three times. The precipitated polymer was suspended in 80 mL of DCM and  
157 the organic phase was washed with 200 mL of water to remove unreacted quercetin.  
158 The process was repeated to obtain a clear supernatant. Finally, the DCM was  
159 evaporated with a Buchi R-300 Rotavapor, and the polymer was dried under high  
160 vacuum for 3 days at 30°C. The PLGA-quercetin copolymer was stored at 2-4°C for  
161 further characterization and use in nanoparticle synthesis.

162

## 163 **2.3. pNP synthesis**

### 164 **2.3.1. Synthesis of PLGA-Eudragit RL-100 nanoparticles**

165

166 The polymeric nanoparticles were synthesized employing a single emulsion  
167 evaporation technique. Briefly, an organic phase was created by mixing Eudragit RL  
168 100 (60 mg) and PLGA (200 mg) in ethyl acetate to acetone (8:2) solution (6 mL), with  
169 mild stirring at room temperature for 30 minutes. Next, quercetin or rhamnazin was  
170 added to the organic phase. Rhamnazin was used to test whether alkylation of  
171 quercetin resulted in a protracted release profile. After 15 min and with continued

172 stirring at room temperature, the organic phase was poured dropwise into 60 mL of  
173 aqueous phase containing 4 mg/mL Tween 80. To reduce droplet size, the emulsion  
174 was microfluidized with an M-110P Microfluidizer (Microfluidics Corp, Westwood, MA)  
175 at 4°C, 30,000 PSI, with four passes. Ethyl acetate in the suspension was evaporated  
176 using a Buchi R-300 Rotavapor (Buchi Corp., New Castle, DE) under vacuum at 32°C  
177 for 2 h. Finally, the nanoparticle suspension was mixed with trehalose at a 1:2 mass  
178 ratio, and the suspension was freeze-dried with a FreeZone 2.5 (Labconco Corp.,  
179 Kansas City, MO) at 32°C for 2 days. A 2 mL solution of polyvinyl alcohol (PVA; 30  
180 mg) was added before freeze-drying to minimize aggregation after polymeric  
181 nanoparticle resuspension. The powdered samples were kept at -80°C until further  
182 characterization and use. In some studies, PLGA was covalently modified with Q prior  
183 to pNP synthesis (see section 2.2), but all other steps were identical. The mean size,  
184 PDI and zeta potential of the polymeric nanoparticles were measured by Dynamic Light  
185 Scattering (DLS) with a Malvern Zetasizer nano ZS (Malvern Panalytical inc,  
186 Westborough, MA). Because pilot studies demonstrated an impact of trehalose on cell  
187 growth, for studies examining the effect of nano-delivered quercetin on vascular  
188 smooth muscle cell proliferation, the pNP were prepared fresh on the day of the  
189 experiment, without freeze-drying and without trehalose. However, all other  
190 components were maintained at a similar ratio to ensure that the pNP formulations for  
191 the two studies were similar.

192

## 193 **2.4 Nanoparticle characterization**

### 194 **2.4.1 Morphology**

195 Transmission electron microscopy (TEM) was accomplished using a JEOL JM-1400  
196 (JEOL USA Inc., Peabody, MA) and an accelerating voltage of 120 kV. As such, TEM



197 was used to analyse the structure of empty PLGA polymeric nanoparticles (pNP(E)),  
198 PLGA NP with entrapped rhamnazin (pNP(eR)), PLGA pNP with entrapped quercetin  
199 (pNP(eQ)) and PLGA NP with conjugated quercetin (pNP(cQ)). One drop of the pNP  
200 resuspension in nanopure water was placed onto a carbon film 400 mesh copper grid,  
201 and the excess amount of solution was removed with sterile filter paper. A solution of  
202 2% uranyl acetate was used for staining. After 5 min, a separate sterile filter paper was  
203 utilized to remove excess uranyl acetate.

204

#### 205 **2.4.2 Size Distribution and Zeta Potential Characterization**

206 Dynamic light scattering (DLS) (Malvern Panalytical, Westborough, MA) was employed  
207 to characterize the nanoparticles for size, polydispersity and zeta potential. After  
208 resuspension in low resistivity water, a disposable capillary cell of 1 mL volume was  
209 used to measure size, polydispersity index (PDI), and zeta potential (Smoluchowski  
210 model) for NP.

211

### 212 **2.5 Drug release and biologic efficacy**

#### 213 **2.5. Drug release protocol**

214

215 The release profiles were performed by placing 10mg/mL PLGA-Eudragit RL100 NP  
216 (pNP(eQ), pNP(eR), pNP(cQ)) in dialysis membrane (molecular weight cut-off of  
217 12,000/14,000 g/mol, regenerated cellulose, Fisher Scientific). Sterile PBS was used  
218 for sample resuspension. The samples were dialyzed against 800 mL of PBS at 37°C  
219 under continuous stirring, and PBS was replaced every 8 h in the first 12h and then  
220 every 24h. At pre-determined time points, 0.2 mL samples were taken from inside the  
221 dialysis bag (nanoparticle solution) and to prevent quercetin oxidation, was mixed with  
222 20 µL of 50 mM ascorbic acid. Finally, 800 µL of DMF was added to extract the active

223 components. The samples were vortexed for 1h at room temperature and then stored  
224 at -80°C until drug concentrations could be measured using a high-performance liquid  
225 chromatography (HPLC) method we described previously (15).

226

## 227 **2.6 Cell proliferation assay**

228 Rat aortic smooth muscle cells (RAOSMC; Cell Applications, Inc., San Diego, CA)  
229 were grown to 50-60% confluency in 24-well plates. After serum-starvation for 72 hours  
230 to achieve cell cycle synchronization, the cells were stimulated with phenol red-free  
231 medium containing 10% Fetal Bovine Serum (FBS) and 0.4 mg/mL of either empty  
232 pNP (pNP(E)), or quercetin-containing pNP, including pNP(eQ), pNP(eR) or pNP(cQ).  
233 Cell proliferation was assessed by following the rate of DNA synthesis, determined as  
234 the amount of 5-bromo-2'-deoxy-uridine (BrdU) incorporation (Roche BrDU Labeling  
235 and Detection Kit II, Sigma-Aldrich, St. Louis, MO). Briefly, 100 µL BrdU labelling  
236 reagent was added to each well and the plates were incubated for 2 h at 37 °C. The  
237 medium was aspirated, 300 µL Fixdenat was added, and the plates were incubated for  
238 30 min at room temperature. Next, the Fixdenat was aspirated and 300 µL peroxidase  
239 conjugated anti-BrdU antibody was added to all wells, including the background control  
240 wells, and the plates were incubated for 90 min at room temperature. The wells were  
241 then washed 3 times with 300 µL washing buffer, and 300 µL of substrate were added  
242 and allowed to incubate for 2 minutes in dark conditions and at room temperature.  
243 Finally, 75 µL 1M H<sub>2</sub>SO<sub>4</sub> were added to each well, and after rotating for 2 minutes,  
244 absorbance was read at 450 nm (reference 690 nm) using a Biotek Synergy microplate  
245 reader. Data were expressed as a percent of control cells stimulated with only 10%  
246 FBS but with no nanoparticles.

247

## 248 **2.7 Adhesion Study Protocol**

249 Because endothelial cells are denuded during angioplasty, smooth muscle cells are  
250 the predominate cell type exposed to the balloon to accept pNP containing polyphenols  
251 during balloon inflation. Moreover, as explained in the introduction, these cells are  
252 typically calcium-laden in PAD. Thus, to model advanced calcified lesion in PAD,  
253 RAOSMC were cultured and maintained in a black-walled, clear bottom, tissue-culture  
254 treated plates with growth medium compared to calcification medium for two weeks  
255 (33). Growth medium contained DMEM with 10% fetal calf serum. Calcification  
256 medium contained high glucose (4.5 g/L) DMEM with 10% fetal calf serum, 100 U/mL  
257 penicillin, 100 µg/mL streptomycin, 6 mmol/L CaCl<sub>2</sub>, 10 mmol/L sodium pyruvate, 10<sup>-6</sup>  
258 mol/L insulin, 50 µg/mL ascorbic acid, 10 mmol/L β-glycerophosphate and 10<sup>-7</sup> mol/L  
259 dexamethasone. Calcification was confirmed using Von Kossa staining (S1 Fig). Next,  
260 10 mg/mL suspensions of pNP(E), pNP(eQ), and pNP(cQ) were diluted in PBS to a  
261 final concentration of 2.0 mg/mL. From each suspension 100 µL were placed in wells  
262 of the culture plates containing calcified/uncalcified RAOSMC and the cells were  
263 incubated at 37°C for 2 hours. We selected 2 hours because pilot observations  
264 determined that 2 hours was the minimum amount of time required for pNP to fall to  
265 the bottom of the well and adhere. Drug-containing medium was then removed and  
266 the cells were subjected to a 100 µL PBS wash before every well was aspirated to  
267 dryness. Fluorescence intensity was quantified before and after washing using a Biotek  
268 Synergy 2 fluorescence plate reader. Measures of fluorescence detected for cells  
269 containing no pNP were used for background correction. In addition, after washing,  
270 green fluorescence images of wells were captured on a ZOE Fluorescent Cell Imager  
271 (BIO-RAD). Lysis buffer was then placed in wells so that protein levels could be

272 quantified by BCA protein assay. Measures of fluorescence units were normalized to  
273  $\mu\text{g}$  protein in each well.

274

## 275 **2.8. Balloon coating and characterization**

### 276 **2.8.1. Balloon fabrication and ultrasonic coating**

277 A balloon catheter with a 13.8 cm extrusion, a 2.7 FR polycarbonate luer fitting and a  
278 1.25 mm x 10 mm PET over-the-wire balloon was custom manufactured by Interplex  
279 Medical, LLC (Milford, OH). Eight balloons were shipped directly to Sono-Tek  
280 Corporation (Milton, NY), where they were professionally coated with pNP(eQ) using  
281 the following ultrasonic coating method. First, the sample for coating was drawn into a  
282 10 mL syringe, was affixed to a MediCoat BCC coating system and was allowed to  
283 reach room temperature. Prior to coating, an atomization test was conducted using a  
284 Sono-Tek 48 kHz Accumist nozzle. The material was found to coat flawlessly at low  
285 power output. A 3-axis XYZ Gantry System (500 mm x 500 mm x 100 mm), a rotator  
286 and the appropriate mounting hardware was interfaced to the system so as to  
287 accommodate the balloon catheter. The balloons were inflated and coated using 5, 10,  
288 15 or 20 layers with  $n=2$  balloons coated per group, so that the impact of deposition  
289 amount on uniformity and drug loading could be determined. Note that the prohibitive  
290 costs of the balloon catheters precluded our ability to test more than 8 balloons.

291

### 292 **2.8.2. Fluorescence imaging to quantify pNP loading and uniformity of coating**

293

294 The balloons were affixed on microscopic slides with tape, making every effort to keep  
295 them aligned with the center of the slide (deviation of  $\leq 3^\circ$ ). Microscopic images were  
296 acquired at 4x magnification using a Cytation 3 Image reader (BioTek Instruments Inc,  
297 Winooski, VT) in TIFF format, with a 16-bit resolution, both in the visible range and in

298 fluorescent mode. The field of view was panned over in sequential images in order to  
299 image the whole balloon in a sequence, and 7-9 images were captured for each  
300 balloon. In one case the balloon exceeded the image edges at 4x magnification, so a  
301 “top” and a “bottom” image were later combined using the Stitching (34) plugin  
302 provided by Fiji (formerly ImageJ) analysis software. The images were acquired with  
303 the same imaging parameters (LED intensity=3, integration time=100 ms, camera  
304 gain=14), preselected based on the “best” image obtained for a 20 layer-coated  
305 balloon, to avoid overly saturating the image brightness of the samples with thinner  
306 coatings. As will be apparent in Results, images of one 20 layer-coated balloon  
307 (20LYR1) were slightly over-saturated toward the edges of the balloon. However, this  
308 did not impact the resulting quantitative measures, as these measurements were  
309 performed mainly along the center axis of the balloon. The fluorescent loadings were  
310 quantified based on the histograms of two rectangular regions of interest (ROI) per  
311 image (Fig 1), each of them 100,000 (500x200) pixels in size (total of 12-14 histograms  
312 per coated balloon sample) corresponding to 540,832  $\mu\text{m}^2$  (0.54  $\text{mm}^2$ ). The ROIs were  
313 located along the longitudinal axis as identified using equal distances from the top and  
314 bottom edges. The quantification was performed by measuring the mean intensity in  
315 each ROI, then averaging the means across all ROIs for a given balloon. Additionally,  
316 the overall fluorescence was determined by integrating all brightness values in each  
317 histogram and averaging the total brightness across all ROIs for a given balloon.  
318 Coating uniformity was determined based on two separate measurements:  
319 1. The first measurement used the standard deviation of each histogram, with higher  
320 standard deviations indicating a less uniform distribution. However, as the images were  
321 much “brighter” for the balloons containing higher loading, these values may not be  
322 used very reliably to compare balloons possessing differing numbers of layers; i.e. the

323 balloons with fewer layers (thus lower intensities overall) will always have smaller  
324 standard deviations compared to the balloons with more layers and larger overall  
325 brightness.

326 2. As an alternative for uniformity of distribution, we also quantified the percent of each  
327 histogram area that had brightness intensity within  $\pm 1$ -SD, which is likely a better  
328 indicator of uniformity of distribution, as it indicates how many pixels (or  $\mu\text{m}^2$ ) have a  
329 brightness of Mean  $\pm$ SD.

330

331 **Figure 1.** Representative balloon coating images illustrating methods used for assessing  
332 uniformity. Red circles indicate points of reference for recording the location of segments  
333 examined (yellow boxes). Each picture has a width of 1973  $\mu\text{m}$  and a height of 1457  $\mu\text{m}$ ,  
334 and the illustration highlights two distinctive areas (left-right) for histogram-based  
335 fluorescence analysis. In **A (top row)**, balloon 1 coated with 5 layers (5LYR1), the red circle  
336 is 5941  $\mu\text{m}$  from proximal end, and in **B (bottom row)**, balloon 2 coated with 15 layers  
337 (15LYR2), the red circle is 5504  $\mu\text{m}$  from the proximal end.

338

339 Finally, the fluorescence and brightfield images were stitched together to reconstruct  
340 the whole balloon (34), and overlaid for illustration purposes (Fig 2). All image  
341 analyses were performed using Fiji software, and corresponding histogram data was  
342 exported into Excel for analysis before plotting using GraphPad Prism version 9  
343 Software (La Jolla, CA).

344

345 **Figure 2:** Example of stitched images used to reconstruct the balloons for image analysis.  
346 Shown is balloon 2 coated with 5 (**A**), 10 (**B**), 15 (**C**), and 20 layers (**D**) of pNp coating, visible  
347 + fluorescent green overlay (at 75% opacity).

348

349

### 350 **2.8.3. Quantification of pNP and drug loading using gravimetric analysis and** 351 **HPLC**

352 Prior to gravimetric analysis, the balloons were clipped from their catheters and were  
353 dried under vacuum for 1 hour. Their weights were measured using a Radweg  
354 analytical balance. The coating was then eluted using a 1:1 mixture of 90% acetonitrile:  
355 dimethylformamide. The coating suspension was acidified with ascorbic acid, vortexed  
356 vigorously and centrifuged. The supernatants were stored at -80°C until HPLC  
357 analysis. Finally, the balloons were dried again under vacuum and weighed, so that  
358 total coating weights for each balloon could be determined.

359

360

## 361 **3. Results and discussion**

### 362 **3.1. Nanoparticle characterization**

363 Empty pNP, pNP with entrapped quercetin, pNP with entrapped rhamnazin, and pNP  
364 with quercetin covalently attached to PLGA were spherical in shape with a narrow size  
365 distribution (Fig 3 and Table 1). The particles ranged in size from  $64.9 \pm 0.8$  nm to  
366  $161.9 \pm 26.6$  nm and were monodispersed (polydispersity index (PDI) < 0.2). The  
367 exception was rhamnazin entrapped pNP, which exhibited a PDI of  $0.34 \pm 0.016$  (Table  
368 1). Empty pNP and pNP loaded with polyphenols quercetin and rhamnazin possessed  
369 a small positive charge, with zeta potentials of +6.4 - 9.3 mV, while pNPs with  
370 covalently attached quercetin possessed a negative charge (zeta potential =  $-29.9 \pm$   
371  $2.4$  mV; Table 1).

372

373 **Figure 3:** TEM images of (A) empty pNP (pNP(E)); (B) pNP with entrapped rhamnazin  
374 (pNP(eR)) at magnification of 50,000X; (C) pNP with entrapped quercetin (pNP(eQ)); and (D)  
375 pNP with covalently attached quercetin (pNP(cQ)) at magnification of 80,000X.

376

377 **Table 1: Physical Characteristics of the nanodelivery systems**

378

|                           | Size (nm)    | PDI           | Zeta potential (mV) |
|---------------------------|--------------|---------------|---------------------|
| Empty nanoparticles       | 64.9 ± 0.8   | 0.129 ± 0.032 | 6.4 ± 0.3           |
| Entrapped quercetin pNPs  | 67.3 ± 1.0   | 0.169 ± 0.003 | 5.9 ± 0.6           |
| Entrapped rhamnazin pNPs  | 161.9 ± 26.6 | 0.342 ± 0.016 | 9.3 ± 0.4           |
| Conjugated quercetin pNPs | 106.6 ± 0.8  | 0.050 ± 0.03  | -29.9 ± 2.4         |

379

380

### 381 3.2. Drug release study

382 The drug release profile for all 3 entrapped active substances was measured over 6  
383 days. The formulations with entrapped drugs exhibited a burst release within the first  
384 day, followed by a more gradual drug release over the remainder of the 6-day period.  
385 While entrapped quercetin released rapidly, with 99.7 % of the pNP-entrapped  
386 quercetin released by day 3, the release was slightly delayed when more hydrophobic  
387 alkylated quercetin (rhamnazin) was used, with 87.7% released by day 3. The covalent  
388 attachment of quercetin to PLGA further delayed its release, as indicated by no burst  
389 release, only 64.8% release by day 3, and a gradual release over the remaining 3 days  
390 of incubation (Fig 4).

391

392 **Figure 4:** Measures of percent drug release from pNP containing entrapped quercetin  
393 (pNP(eQ)), covalently attached quercetin (pNP(cQ)) and entrapped rhamnazin (pNP(cR)).  
394 Protracted release was observed mainly for pNPs(cQ). Data are means ± SD for n=3.

395



### 396 3.3. Cell proliferation assay

397 RAOSMC were synchronized, stimulated with 10% FBS  $\pm$  0.4 mg/mL empty or drug-  
398 loaded pNP for 2 h and rates of cell proliferation were assessed at 24, 48, and 72 hours  
399 as relative rates of BrDU incorporation. These relative rates are expressed as a  
400 percent of BrDU incorporation assessed for controls cells receiving no treatment. A  
401 two-way ANOVA revealed a significant effect of treatment, time and a significant  
402 interaction between treatment and time (Fig 5), with all pNP treatments significantly  
403 reducing RAOSMC proliferation by 11 to 30% at 24 hours. Note that at this initial time  
404 point, even empty pNP – pNP(E) - reduced cell proliferation, though the greatest effect  
405 was observed for entrapped quercetin (pNP(eQ)). By 48 hours, however, only the  
406 drug-containing particles significantly reduced proliferation and by 72 hours, only pNP  
407 covalently modified with Q - pNP(cQ) - maintained its inhibitory effect. Of note, by 72  
408 hours, the empty pNPs exhibited a significant increase in RAOSMC proliferation,  
409 although it is unclear whether the 8% increase in proliferation observed for this  
410 treatment group and time point is of biologic significance.

411  
412 **Figure 5:** Rat aortic smooth muscle cells loaded for 2 hours with empty pNPs (pNPs(E)),  
413 entrapped quercetin (pNPs(eQ)), covalent quercetin (pNPs(cQ)) and entrapped rhamnazin  
414 (pNPs(eR)) exhibit reduced rates of cell proliferation at 24, 48 and 72 hours after washing.  
415 DNA synthesis was assessed by determining the incorporation of BrDU compared to control  
416 cells treated with no pNPs. Data are means  $\pm$  SD for n=8. Two-way ANOVA revealed a  
417 significant effect of treatment. \*Indicates significance compared to controls for the same time  
418 point, revealed using Dunnett's post-hoc test. Dotted line represents the response for control  
419 cells treated with no pNPs, denoted as 100%.

420

### 421 3.4. Measures of pNP adhesion

422  
423 Zeta potential measures showed that the pNP(cQ) possess a negative, rather than a  
424 positive charge. Thus, we hypothesized that upon balloon inflation, these particles  
425 would exhibit a reduced ability to bind the negatively charged phospholipid bilayer.  
426 However, typically, atherosclerotic arteries in PAD are calcified, with tissues  
427 accumulating calcium hydroxyapatite. Calcium hydroxyapatite crystals contain both  
428 positive and negative ions and its surface charge is highly dependent upon pH (35)  
429 Thus, we further hypothesized that given the ionic nature of calcium hydroxyapatite  
430 crystals, the pNP may actually exhibit considerable binding to smooth muscle that  
431 has become calcified. To test this hypothesis, we allowed the pNP to adhere to  
432 RAOSMCs, with one cohort of these cells cultured under calcification conditions. We  
433 used fluorescence imaging to quantify pNP adhesion given the ability of quercetin to  
434 fluoresce strongly. Results were that pNP containing Q, including eQ and cQ,  
435 exhibited greater fluorescence compared to pNP containing no Q (pNP(E); Figs 6-7).  
436 Fluorescence imaging generally supported this finding, except that we noted for cells  
437 treated with pNP containing covalently attached quercetin, strong fluorescence was  
438 detected in clusters among cells that were calcified (Fig 8). We theorize that perhaps  
439 these clusters represent pNP(cQ) binding to calcium hydroxyapatite crystals within  
440 the smooth muscle cell cultures.

441  
442 **Figure 6:** pNPs(cQ) exhibit a reduced ability to bind to rat aortic smooth muscle cells but  
443 their binding is resistant to washing and calcification. pNP suspensions at 2 mg/mL were  
444 allowed to bind to cells for 2 hours before washing with buffer. Some sets of cells were  
445 subjected to a calcification treatment prior to pNP exposure. Green fluorescence determined  
446 before and after washing was normalized to protein in the well. Data are means  $\pm$  SD for  
447 n=9. Three-way ANOVA revealed a significant effect of pNP treatment, calcification and

448 washing. \*Indicates significance compared to empty nanoparticles (pNPs(E)) for the same  
449 cell treatment. #Represents significance compared to unwashed wells for the same pNP  
450 treatment.

451  
452 **Figure 7:** Representative images of green fluorescence within rat aortic smooth muscle cells  
453 exposed to pNPs containing quercetin. pNP suspensions at 2 mg/mL were allowed to bind to  
454 cells for two hours before washing with buffer. Some sets of cells were subjected to a  
455 calcification treatment prior to pNP exposure (right panel). Green fluorescence was imaged  
456 after washing. Yellow bar = 100  $\mu$ m.

457  
458 **Figure 8:** pNPs containing covalently attached quercetin exhibit binding to clusters (indicated  
459 by arrows) within calcified smooth muscle cell cultures that were visible in both brightfield (A)  
460 and fluorescence (B) images.

461  
462 **3.5. Loading based on fluorescence and the uniformity of coating**  
463 **distribution**

464  
465 The results of the image analysis indicate that increasing the number of layers  
466 increased the fluorescence intensity of the coating, as expected. Note that balloons  
467 were named by denoting 1) the number of layers applied (i.e., 5 layers = 5LYR),  
468 followed by 2) balloon sample number (e.g., 5LYR2 = balloon sample 2 coated with 5  
469 layers). There was a clear difference between the samples with 5 layers (5LYR1 and  
470 5LYR2) and the ones with 20 layers (20LYR1 and 20LYR2) (Fig 9A). However, for  
471 balloons with an intermediate number of layers (10LYR1-15LYR1), differences in  
472 mean brightness were not clearly distinct from one another, even though both of these  
473 had a clearly decreased brightness compared to those with 20 layers, and an  
474 increased brightness compared to those with 5-layer balloons. These findings are  
475 supported by the drug loading data presented in Fig 10, where the balloons with 10

476 and 15 layers show relatively similar amounts of quercetin loadings. These findings  
477 may not necessarily indicate an issue with the coating process, as 10LYR2 and  
478 15LYR2 were found to have good coating uniformity across the balloon surface as  
479 indicated by both the standard deviations and percent coverage. Overall fluorescence  
480 as determined by integrating brightness values over the whole ROIs yielded similar  
481 results as the mean values and thus, are not presented here.

482

483 **Figure 9.** Fluorescence imaging revealed that ultrasonic coating with pNPs entrapping  
484 polyphenols yields uniform coatings. A) Overall mean fluorescence and corresponding  
485 standard deviations for n=8 samples (balloons ultrasonically coated). Data illustrated in the  
486 graph represent mean fluorescence  $\pm$  SD (in unit of brightness per  $\mu\text{m}^2$ ). Maximum brightness  
487 for a 16-bit image is 65535, corresponding to 12117.42 per  $\mu\text{m}^2$ . B) Percent of balloon area  
488 that has pixels with fluorescence intensity within a  $\pm$  1-SD of the mean fluorescence. Data  
489 represent means  $\pm$  SD for n=8 samples. Higher value indicates better uniformity.

490

491 **Figure 10.** Amount of quercetin (Q) and quercetin nanoparticles (pNPs) in balloon coating. A)  
492 pNPs were eluted from the balloons using organic solvent and pNP load was determined  
493 gravimetrically. Total loading in  $\mu\text{g}$  was normalized to balloon areas. Data represent means  $\pm$   
494 SD for 5 measures per balloon. B) pNPs were eluted from the balloons using organic solvent  
495 and the Q content was determined using HPLC. Data represent means  $\pm$  SD for n=3-4 replicate  
496 measures/balloon.

497

498 Standard deviations for the histograms (Fig 9A) suggest that the uniformity of coating  
499 deposition decreases with an increasing number of layers deposited. However, these  
500 findings may be biased by the fact that balloons with fewer coating layers would have  
501 much lower overall brightness and thus, smaller standard deviations associated with  
502 those mean values. To compensate for differences in standard deviations due to

503 differences in the magnitude of overall brightness, standard deviations were  
504 normalized to the mean of each histogram (Table 2). This additional analysis indicates  
505 that two of the balloons (10LYR1 and 15LYR1) exhibited a deviation of more than 25%  
506 of the mean value, which may be indicative of a lower uniformity of coating compared  
507 to the other samples.

508

509 **Table 2: Average fluorescence brightness, absolute standard deviations, and**  
510 **normalized standard deviations for the coated balloons (max possible brightness =**  
511 **12117.4/ $\mu\text{m}^2$ ).**

|        | Average brightness<br>(intensity/ $\mu\text{m}^2$ ) | Absolute STD<br>(intensity/ $\mu\text{m}^2$ ) | Normalized STD<br>(% of mean) |
|--------|-----------------------------------------------------|-----------------------------------------------|-------------------------------|
| 5LYR1  | 955.38                                              | 108.16                                        | 11.3%                         |
| 5LYR2  | 908.64                                              | 137.25                                        | 15.1%                         |
| 10LYR1 | 3029.37                                             | 975.13                                        | 32.2%                         |
| 10LYR2 | 4502.90                                             | 458.34                                        | 10.2%                         |
| 15LYR1 | 2547.79                                             | 661.59                                        | 26.0%                         |
| 15LYR2 | 3919.94                                             | 694.69                                        | 17.7%                         |
| 20LYR1 | 9422.61                                             | 1905.54                                       | 20.2%                         |
| 20LYR2 | 6787.45                                             | 1467.44                                       | 21.6%                         |

512

513

514 The second histogram-based measurement of coating uniformity was determined by  
515 quantifying the percent area in each histogram that has pixels with brightness (*i.e.*  
516 fluorescence) within  $\pm 1$ -SD of the mean value. This measurement should be  
517 independent of absolute pixel brightness in a given ROI. Thus, this value can be used  
518 more reliably to compare uniformity between samples with differing numbers of layers  
519 (Fig 9B). Based on these measurements, the percent area covered ranged from 67.6  
520 to 75.8%, which can be considered from good to excellent coverage or uniformity,  
521 based on a uniformity scale of: <55% poor, 55-60% moderate, 60-70% good, 70-75%  
522 very good, 75-80% excellent, >80% outstanding, with outstanding very rarely occurring  
523 in normal image processing of spray-type coatings (a 100% value would indicate all

524 pixels in the ROI having the exact same value, which would be nearly impossible to  
525 achieve).

526

527 Several of the balloon samples showed cracking of the fluorescent layers, clearly  
528 visible in the fluorescent images which may have an unquantified influence on the  
529 results of the image analysis, but based on the visual inspection of the images, these  
530 were relatively sparse and otherwise small overall. As the coating process occurred in  
531 a different location than the fixation on the slide and subsequent imaging, it cannot be  
532 ascertained if the cracks are a result of the coating process itself or an artifact  
533 introduced by the maybe too rapid drying after coating, or by handling during transport  
534 and slide fixation. As the samples with the smallest number of layers (5LYR1 and  
535 5LYR2) did not exhibit any visible cracking, it seems that this phenomenon occurs only  
536 for thick layers, which, upon drying, are more prone to cracking.

537

### 538 **3.6. Loading of pNP and quercetin, assessed using gravimetric analysis** 539 **coupled to HPLC**

540 Gravimetric analysis mirrored the results of the fluorescence analyses. pNP coating  
541 weights increased nearly linearly with increasing numbers of layers, although coatings  
542 with 10 and 15 layers contained more similar amounts of deposited pNP compared to  
543 other groups (Fig 10A). In total, 0.26-1.5 mg of pNP were successfully applied through  
544 5-20 coating layers, respectively (not shown). Adjusting for the surface area of the  
545 balloon, this amounted to 7-40  $\mu\text{g}/\text{mm}^2$  (Fig 10A).

546 HPLC analysis of pNP eluted from the balloons revealed a more linear increase in  
547 quercetin levels as the coating layers were increased, with total quercetin loading  
548 ranging from 0.8-14  $\mu\text{g}$  through 5-20 layers, respectively (Fig 10B).

549

550

551

## 552 **5. Conclusions**

553 Peripheral artery disease (PAD) is an inflammatory disease primarily caused by  
554 atherosclerosis, which gradually narrows the arterial lumen. Revascularization is  
555 considered the first line therapy for symptomatic obstructive PAD (10, 36). Catheter-  
556 based percutaneous interventions are an enduring relief for arterial obstruction (36)  
557 and are considered the primary method for revascularization (36-38). Restenosis is  
558 defined by a reduction in the diameter of the vessel lumen after angioplasty (39). Much  
559 research and commercialization effort has been devoted to manufacturing device  
560 technologies targeting restenosis (40). The use of polymeric or metallic stents provides  
561 better acute results, but these improvements arise at the expense of increased vessel  
562 injury (36, 41, 42), with stents commonly resulting in increased risks of thrombosis and  
563 stent fracture (43, 44). The need to address the associated risk that comes with  
564 stenting led to non-stent-based local drug delivery. Drug-coated balloons are  
565 alternative approaches in which the balloon is coated with a thin, active substance  
566 surface layer (Byrne et al., 2013). Delayed healing along with vascular toxicity of the  
567 anti-proliferative agents applied to the balloon's surface was observed in animal  
568 studies after DCB angioplasty (36). In our own prior studies, a nanoparticle delivery  
569 system was designed to provide an alternative treatment for PAD, using polyphenols  
570 with high therapeutic indices as alternatives to the anti-proliferative agents in  
571 commercial products (15). Similar coatings releasing quercetin and resveratrol from  
572 drug eluting stents demonstrated outstanding effects in reducing VSMC proliferation,  
573 platelet activation and inflammation, while promoting re-endothelization (45, 46). The

574 cationic characteristics of the pNP were provided by addition of a cationic Eudragit  
575 RL100 polymer during pNP synthesis. By adjusting the amount of positive charge on  
576 the system, the pNP were designed to be biocompatible and biodegradable and proved  
577 to meet the specification ideal for cellular uptake and maintaining a continued period  
578 of release. The PLGA nanoparticles with pNP(eQ), pNP(eR), as well as quercetin  
579 conjugated to PLGA (pNP(cQ), were developed at a size range of 101 nm. All  
580 polyphenols were entrapped separately in PLGA pNPs to allow for their comparison.  
581 Similar to prior experiments, entrapped quercetin released rapidly in the first 24 hours  
582 except that this time the active substance was entrapped separately in pNPs not  
583 together with RESV in its methoxylated form (15). However, covalent attachment of  
584 quercetin delayed its release as indicated by no burst release and a more protracted  
585 profile. The methoxylated derivative of quercetin (rhamnazin) with increased  
586 hydrophobicity provided a slightly more sustained release of quercetin, although was  
587 not as protracted as pNPs possessing covalently-attached Q. In the latter case, release  
588 was sustained for a total of 6 days, which is beneficial since vascular healing, as well  
589 as the cellular events contributing to restenosis, begin within the first 7 days (47).  
590 In this experiment an ultrasonic coating method was used that allowed our pNP  
591 entrapment system to generate a uniform coating. This coating technique will hopefully  
592 minimize non-specific release of drug into the blood and enhance the long-term  
593 retention of drug within vascular tissue, but such specifications will be addressed in  
594 future animal experiments.

595

596 In summary, a key parameter for a successful DCB is delivery of therapeutic levels of  
597 drug at biologically appropriate time points within a critical time window after  
598 endovascular intervention. The synthesized PLGA-based pNP system proved to be



599 biocompatible with a size range required for endocytosis and provided an extended  
600 period of release. Importantly, brief application with pNPs containing covalently-  
601 attached Q demonstrated an ability to reduce VSMC proliferation at least through 72  
602 hours. Studies utilizing a balloon angioplasty model in small animals aimed at testing  
603 the pharmacokinetics of drug delivery to the vascular wall will be required for further  
604 development.

605

## 606 **Acknowledgments**

607 This work was funded by the National Heart, Lung & Blood Institute, National Institutes  
608 of Health, R41 HL142403 and the Louisiana Board of Regents Industrial Ties Research  
609 Subprogram. The authors would like to acknowledge partial support from the LSU  
610 Biological and Agricultural Engineering Department at LSU AgCenter and USDA NIFA  
611 Hatch program (LAB #94443 and LAB #94513). Published with the approval of the  
612 Director of the Louisiana Agricultural Experiment Station as manuscript #2022-232-  
613 36870.

614

615 Disclosures: CAE, CMS and TRD have intellectual property related to the work  
616 presented in the manuscript. TRD is a co-founder of a biomedical company aimed at  
617 developing angioplasty balloon coatings.

618

619

620

621

622

623

624

## 625 7. References

626

627 1. Song P, Rudan D, Zhu Y, Fowkes FJI, Rahimi K, Fowkes FGR, et al. Global,  
628 regional, and national prevalence and risk factors for peripheral artery disease in 2015:  
629 an updated systematic review and analysis. *The Lancet Global Health*.  
630 2019;7(8):e1020-e30.

631 2. Patel MR, Conte MS, Cutlip DE, Dib N, Geraghty P, Gray W, et al. Evaluation  
632 and treatment of patients with lower extremity peripheral artery disease: Consensus  
633 definitions from peripheral academic research consortium (PARC). *Journal of the*  
634 *American College of Cardiology*. 2015;65(9):931-41.

635 3. Jaff MR, Cahill KE, Yu AP, Birnbaum HG, Engelhart Luella MM. Clinical  
636 Outcomes and Medical Care Costs Among Medicare Beneficiaries Receiving Therapy  
637 for Peripheral Arterial Disease. *Annals of Vascular Surgery*. 2010;24(5):577-87.

638 4. Beckman JA, Findeiss LK, Golzarian J, Gornik HL, Halperin JL, Jaff MR, et al.  
639 This article is copublished in *Circulation*, *Catheterization and Cardiovascular*  
640 *Interventions*, the *Journal of Vascular Surgery*, and *Vascular Medicine*. *Jac*.  
641 2011;58(19):2020-45.

642 5. Fowkes FGR, Aboyans V, Fowkes FJI, McDermott MM, Sampson UKA, Criqui  
643 MH. Peripheral artery disease: epidemiology and global perspectives. *Nature Reviews*  
644 *Cardiology*. 2017;14(3):156-70.

645 6. Marrocco CJ, Bush HRL. Peripheral arterial disease. High Risk Diabetic Foot:  
646 Treatment and Prevention. 2010;358:1-8.

647 7. Konishi A, Mitsutake Y, Ho M, Handa N, Koike K, Mochizuki S, et al. Patient  
648 and lesion characteristics in late/very late stent thrombosis with everolimus-eluting  
649 stents from real-world adverse event reporting. *Journal of Cardiology*. 2019:3-8.

- 650 8. Tendera M, Aboyans V, Bartelink ML, Baumgartner I, Clement D, Collet JP, et  
651 al. ESC Guidelines on the diagnosis and treatment of peripheral artery diseases.  
652 European Heart Journal. 2011;32(22):2851-906.
- 653 9. Barrett C, Barshes NR, Corriere MA, Drachman DE, Fleisher LA, Gerry Fowkes  
654 FR, et al. 2016 AHA/ACC Guideline on the Management of Patients With Lower  
655 Extremity Peripheral Artery Disease. Circulation. 2017;135:726-79.
- 656 10. Norgren L, Hiatt WR, Dormandy JA, Nehler MR, Harris KA, Fowkes FG, et al.  
657 Inter-society consensus for the management of peripheral arterial disease.  
658 International angiology : a journal of the International Union of Angiology.  
659 2007;26(2):81-157.
- 660 11. Urasawa K, Sato K, Koshida R, Honma Y. [Endovascular therapy for peripheral  
661 arterial disease]. Nippon rinsho Japanese journal of clinical medicine. 2011;69(2):318-  
662 21.
- 663 12. Analysis AE-b. Stenting for peripheral artery disease of the lower extremities:  
664 An evidence-based analysis2010. 1-88 p.
- 665 13. Thukkani AK, Kinlay S. Endovascular Intervention for Peripheral Artery  
666 Disease. Circulation Research. 2015;116(9):1599-613.
- 667 14. Rogers JH, Laird JR. Overview of new technologies for lower extremity  
668 revascularization. Circulation. 2007;116(18):2072-85.
- 669 15. Dugas TR, Brewer G, Longwell M, Fradella T, Braun J, Astete CE, et al.  
670 Nanoentrapped polyphenol coating for sustained drug release from a balloon catheter.  
671 Journal of Biomedical Materials Research - Part B Applied Biomaterials.  
672 2019;107(3):646-51.

- 673 16. Ali RM, Abdul Kader MASK, Wan Ahmad WA, Ong TK, Liew HB, Omar AF, et  
674 al. Treatment of Coronary Drug-Eluting Stent Restenosis by a Sirolimus- or Paclitaxel-  
675 Coated Balloon. *JACC: Cardiovascular Interventions*. 2019;12(6):558-66.
- 676 17. Van Den Berg JC. In-stent restenosis management: The best is yet to come.  
677 *Journal of Cardiovascular Surgery*. 2017;58(4):508-17.
- 678 18. Goyal SN, Bharti S, Krishnamurthy B, Agrawal Y, Ojha SK, Arya DS. Impact of  
679 metabolic syndrome on re-stenosis development: Role of drug-eluting stents. *Diabetes  
680 and Vascular Disease Research*. 2012;9(3):177-88.
- 681 19. Werk M, Langner S, Reinkensmeier B, Boettcher HF, Tepe G, Dietz U, et al.  
682 Inhibition of restenosis in femoropopliteal arteries. Paclitaxel-coated versus uncoated  
683 balloon: Femoral paclitaxel randomized pilot trial. *Circulation*. 2008;118(13):1358-65.
- 684 20. Tepe G, Laird J, Schneider P, Brodmann M, Krishnan P, Micari A, et al. Drug-  
685 coated balloon versus standard percutaneous transluminal angioplasty for the  
686 treatment of superficial femoral and popliteal peripheral artery disease 12-month  
687 results from the IN.PACT SFA randomized Trial. *Circulation*. 2015;131(5):495-502.
- 688 21. Tepe G, Zeller T, Albrecht T, Heller S, Schwarzwälder U, Beregi JP, et al. Local  
689 delivery of paclitaxel to inhibit restenosis during angioplasty of the leg. *New England  
690 Journal of Medicine*. 2008;358(7):689-99.
- 691 22. Cortese B, Granada JF, Scheller B, Schneider PA, Tepe G, Scheinert D, et al.  
692 Drug-coated balloon treatment for lower extremity vascular disease intervention: An  
693 international positioning document. *European Heart Journal*. 2016;37(14):1096-103.
- 694 23. Doshi M, Sojitra P, Shah D, Dani S, Abizaid A. Technical Insights on Drug-  
695 Coated Balloons II. *Drug-Coated Balloons*. 2019:45-57.

- 696 24. Marzullo R, Aprile A, Clementi F, Stella P, Modena MG, Sangiorgi GM.  
697 Paclitaxel eluting balloon: From bench to bedside. *Minerva Cardioangiologica*.  
698 2009;57(5):597-609.
- 699 25. McFadden EP, Stabile E, Regar E, Cheneau E, Ong ATL, Kinnaird T, et al. Late  
700 thrombosis in drug-eluting coronary stents after discontinuation of antiplatelet therapy.  
701 *Lancet*. 2004;364(9444):1519-21.
- 702 26. Farb A, Heller PF, Shroff S, Cheng L, Kolodgie FD, Carter AJ, et al. Pathological  
703 analysis of local delivery of paclitaxel via a polymer-coated stent. *Circulation*.  
704 2001;104(4):473-9.
- 705 27. Fda. August 7, 2019 UPDATE: Treatment of Peripheral Arterial Disease with  
706 Paclitaxel-Coated Balloons and Paclitaxel-Eluting Stents Potentially Associated with  
707 Increased Mortality. 2019;57:13-5.
- 708 28. Yurdagul A, Kleinedler JJ, McInnis MC, Khandelwal AR, Spence AL, Orr AW,  
709 et al. Resveratrol promotes endothelial cell wound healing under laminar shear stress  
710 through an estrogen receptor- $\alpha$ -dependent pathway. *American Journal of Physiology*  
711 *- Heart and Circulatory Physiology*. 2014;306(6):797-806.
- 712 29. Narula N, Olin JW, Narula N. Pathologic disparities between peripheral artery  
713 disease and coronary artery disease. *Arteriosclerosis, thrombosis, and vascular*  
714 *biology*. 2020;40(9):1982-9.
- 715 30. Karwowski W, Naumnik B, Szczepański M, Myśliwiec M. The mechanism of  
716 vascular calcification—a systematic review. *Medical science monitor: international*  
717 *medical journal of experimental and clinical research*. 2012;18(1):RA1.
- 718 31. Fitzgerald PJ, Ports TA, Yock P. Contribution of localized calcium deposits to  
719 dissection after angioplasty. An observational study using intravascular ultrasound.  
720 *Circulation*. 1992;86(1):64-70.

- 721 32. Fanelli F, Cannavale A, Gazzetti M, Lucatelli P, Wilderk A, Cirelli C, et al.  
722 Calcium burden assessment and impact on drug-eluting balloons in peripheral arterial  
723 disease. *Cardiovascular and interventional radiology*. 2014;37(4):898-907.
- 724 33. Trion A, van der Laarse A. Vascular smooth muscle cells and calcification in  
725 atherosclerosis. *American heart journal*. 2004;147(5):808-14.
- 726 34. Preibisch S, Saalfeld S, Tomancak P. Globally optimal stitching of tiled 3D  
727 microscopic image acquisitions. *Bioinformatics*. 2009;25(11):1463-5.
- 728 35. Harding IS, Rashid N, Hing KA. Surface charge and the effect of excess calcium  
729 ions on the hydroxyapatite surface. *Biomaterials*. 2005;26(34):6818-26.
- 730 36. Byrne RA, Joner M, Alfonso F, Kastrati A. Drug-coated balloon therapy in  
731 coronary and peripheral artery disease. 2013.
- 732 37. Wiseman JT, Fernandes-Taylor S, Saha S, Havlena J, Rathouz PJ, Smith MA,  
733 et al. Endovascular Versus Open Revascularization for Peripheral Arterial Disease.  
734 *Ann Surg*. 2017;265(2):424-30.
- 735 38. AbuRahma AF. When Are Endovascular and Open Bypass Treatments  
736 Preferred for Femoropopliteal Occlusive Disease? *Annals of Vascular Diseases*.  
737 2018;advpub.
- 738 39. Omeh DJ, Shlofmitz E. Restenosis. *StatPearls [Internet]*. 2020.
- 739 40. Curcio A, Torella D, Cuda G, Coppola C, Faniello MC, Achille F, et al. Effect of  
740 stent coating alone on in vitro vascular smooth muscle cell proliferation and apoptosis.  
741 *American Journal of Physiology-Heart and Circulatory Physiology*. 2004;286(3):H902-  
742 H8.
- 743 41. Kuntz RE, Baim DS. Defining coronary restenosis. Newer clinical and  
744 angiographic paradigms. *Circulation*. 1993;88(3):1310-23.

- 745 42. Costa MA, Simon DI. Molecular basis of restenosis and drug-eluting stents.  
746 *Circulation*. 2005;111(17):2257-73.
- 747 43. Rocha-Singh KJ, Bosiers M, Schultz G, Jaff MR, Mehta M, Matsumura JS, et  
748 al. A single stent strategy in patients with lifestyle limiting claudication: 3-year results  
749 from the Durability II trial. *Catheterization and Cardiovascular Interventions*.  
750 2015;86(1):164-70.
- 751 44. Scheinert D, Scheinert S, Sax J, Piorkowski C, Bräunlich S, Ulrich M, et al.  
752 Prevalence and clinical impact of stent fractures after femoropopliteal stenting. *Journal*  
753 *of the American College of Cardiology*. 2005;45(2):312-5.
- 754 45. Kleinedler JJ, Foley JD, Orchard EA, Dugas TR. Novel nanocomposite stent  
755 coating releasing resveratrol and quercetin reduces neointimal hyperplasia and  
756 promotes re-endothelialization. *Journal of Controlled Release*. 2012;159(1):27-33.
- 757 46. Kleinedler JJ, Foley JD, Alexander JS, Roerig SC, Hebert VY, Dugas TR.  
758 Synergistic effect of resveratrol and quercetin released from drug-eluting polymer  
759 coatings for endovascular devices. *Journal of Biomedical Materials Research Part B:*  
760 *Applied Biomaterials*. 2011;99(2):266-75.
- 761 47. Kenagy RD. 7• Biology of Restenosis and Targets for Intervention. *Mechanisms*  
762 *of Vascular*. 2011:115.
- 763



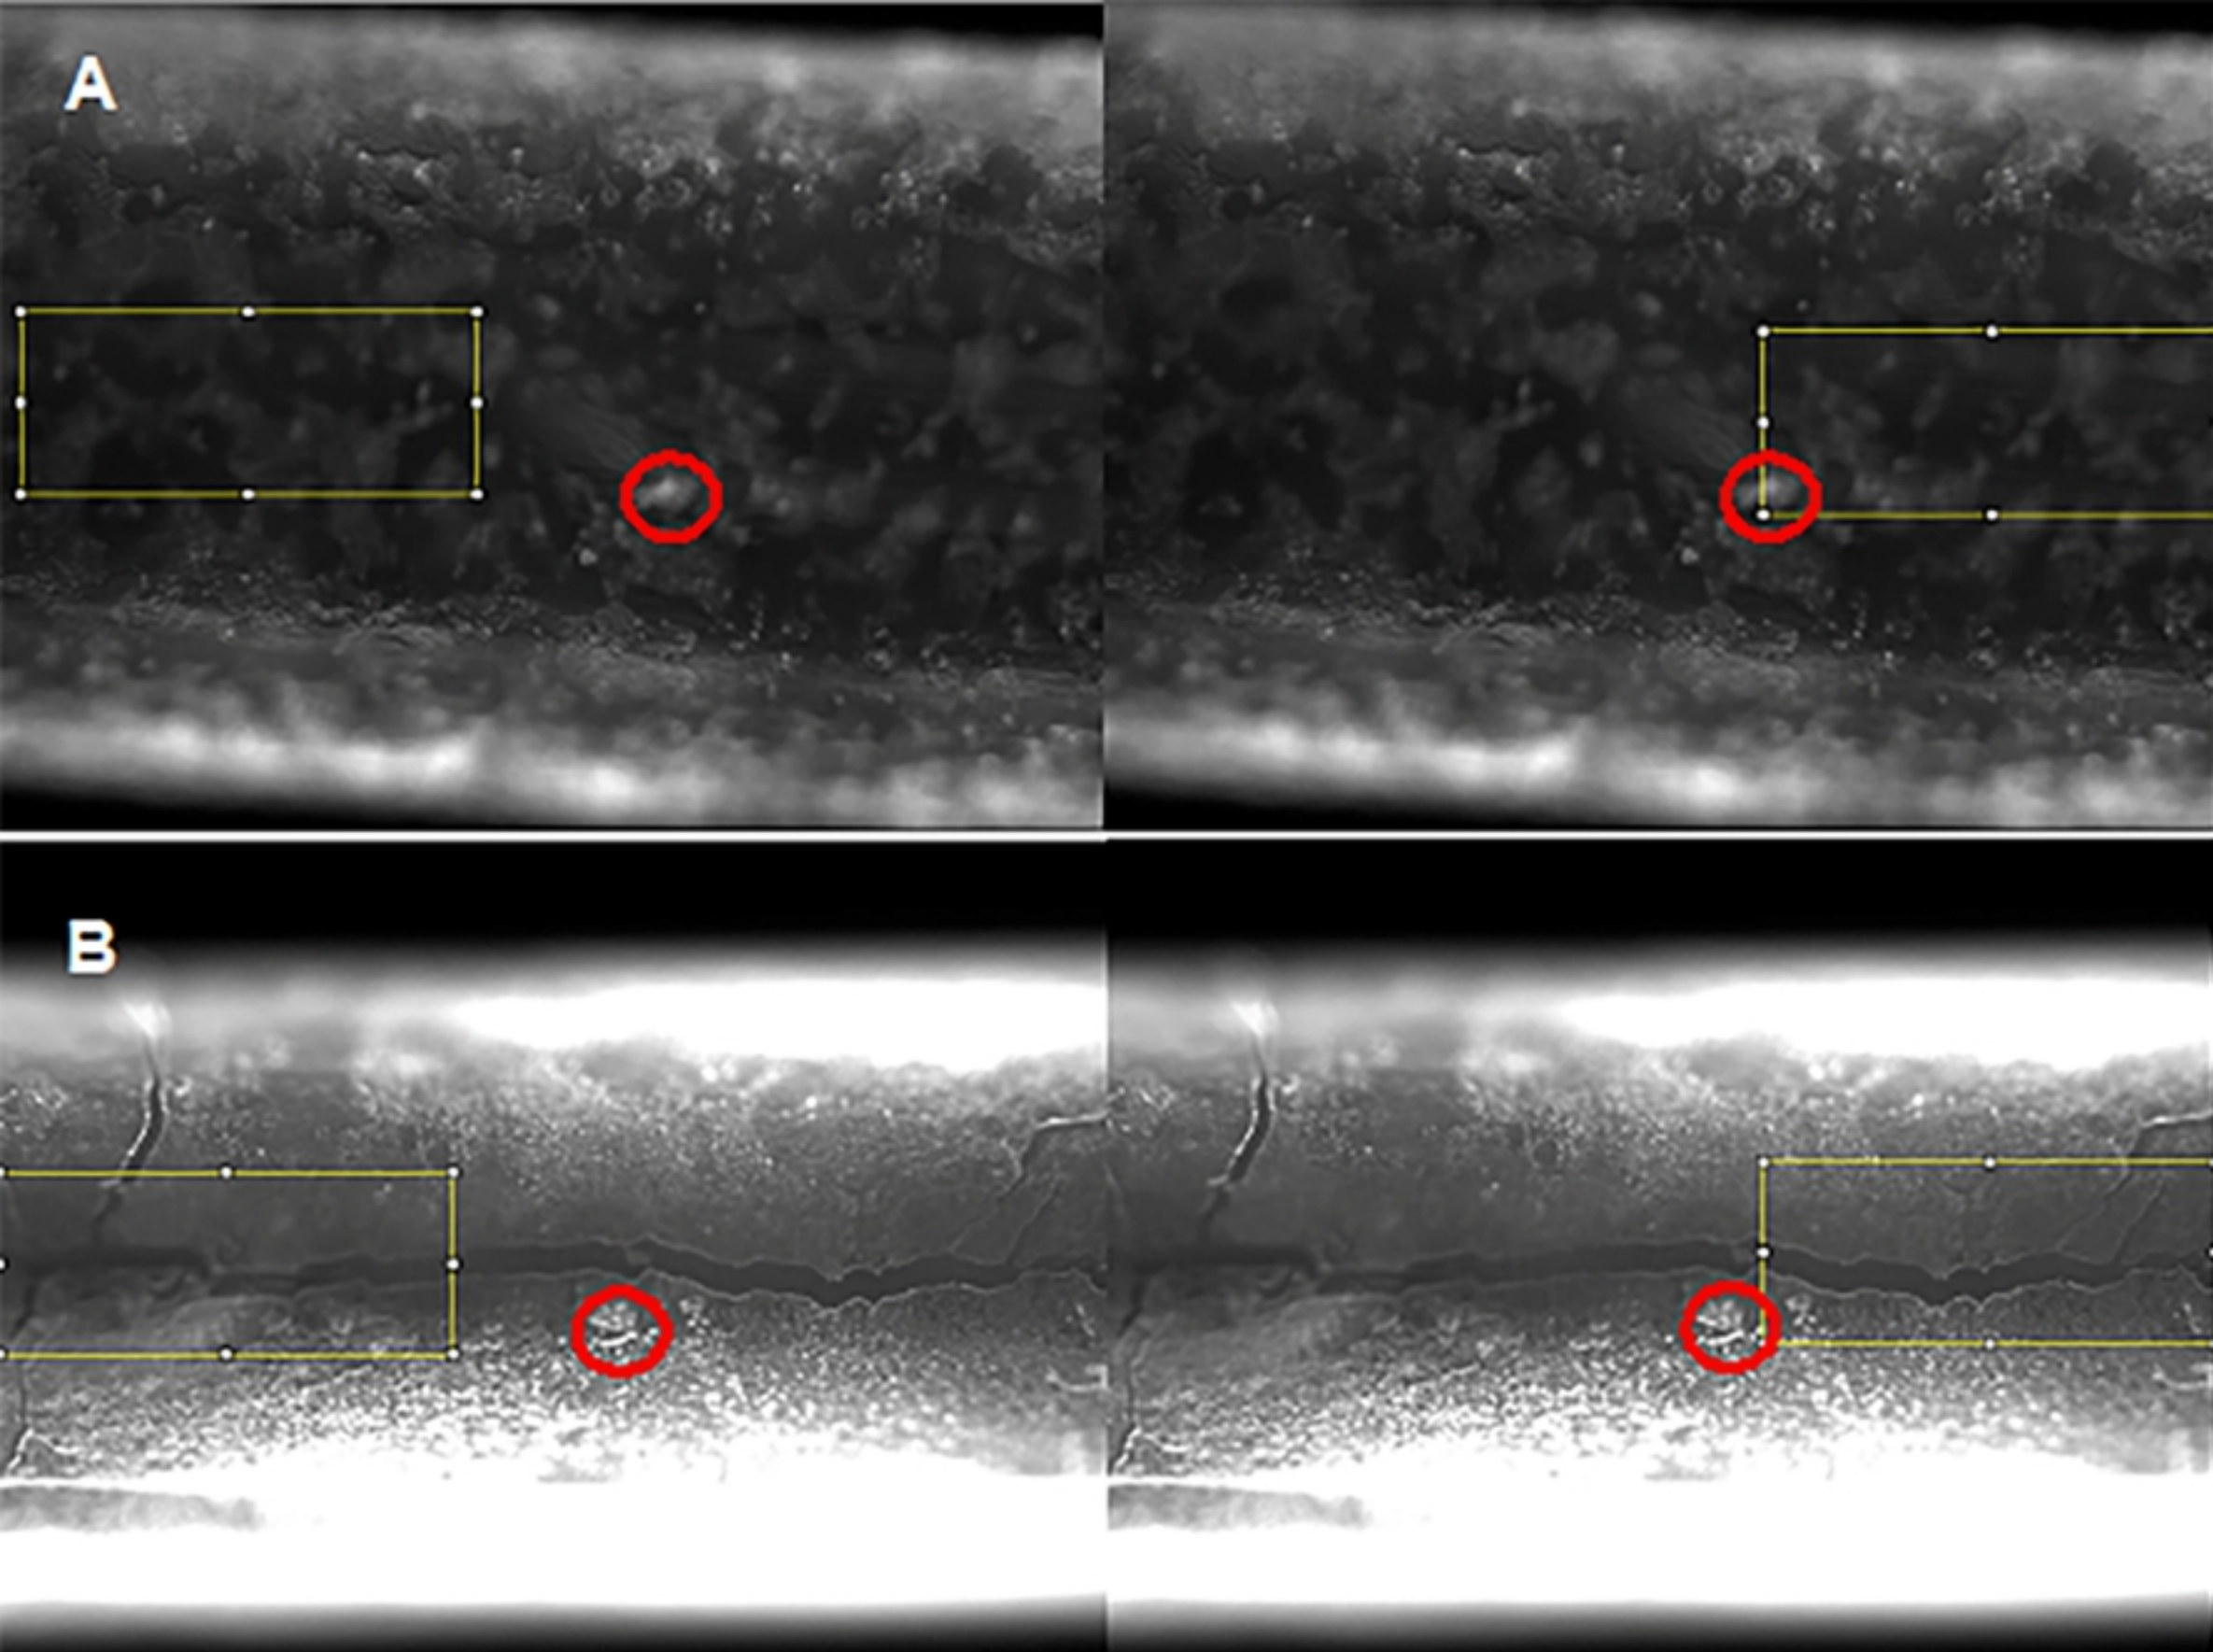

Figure 1

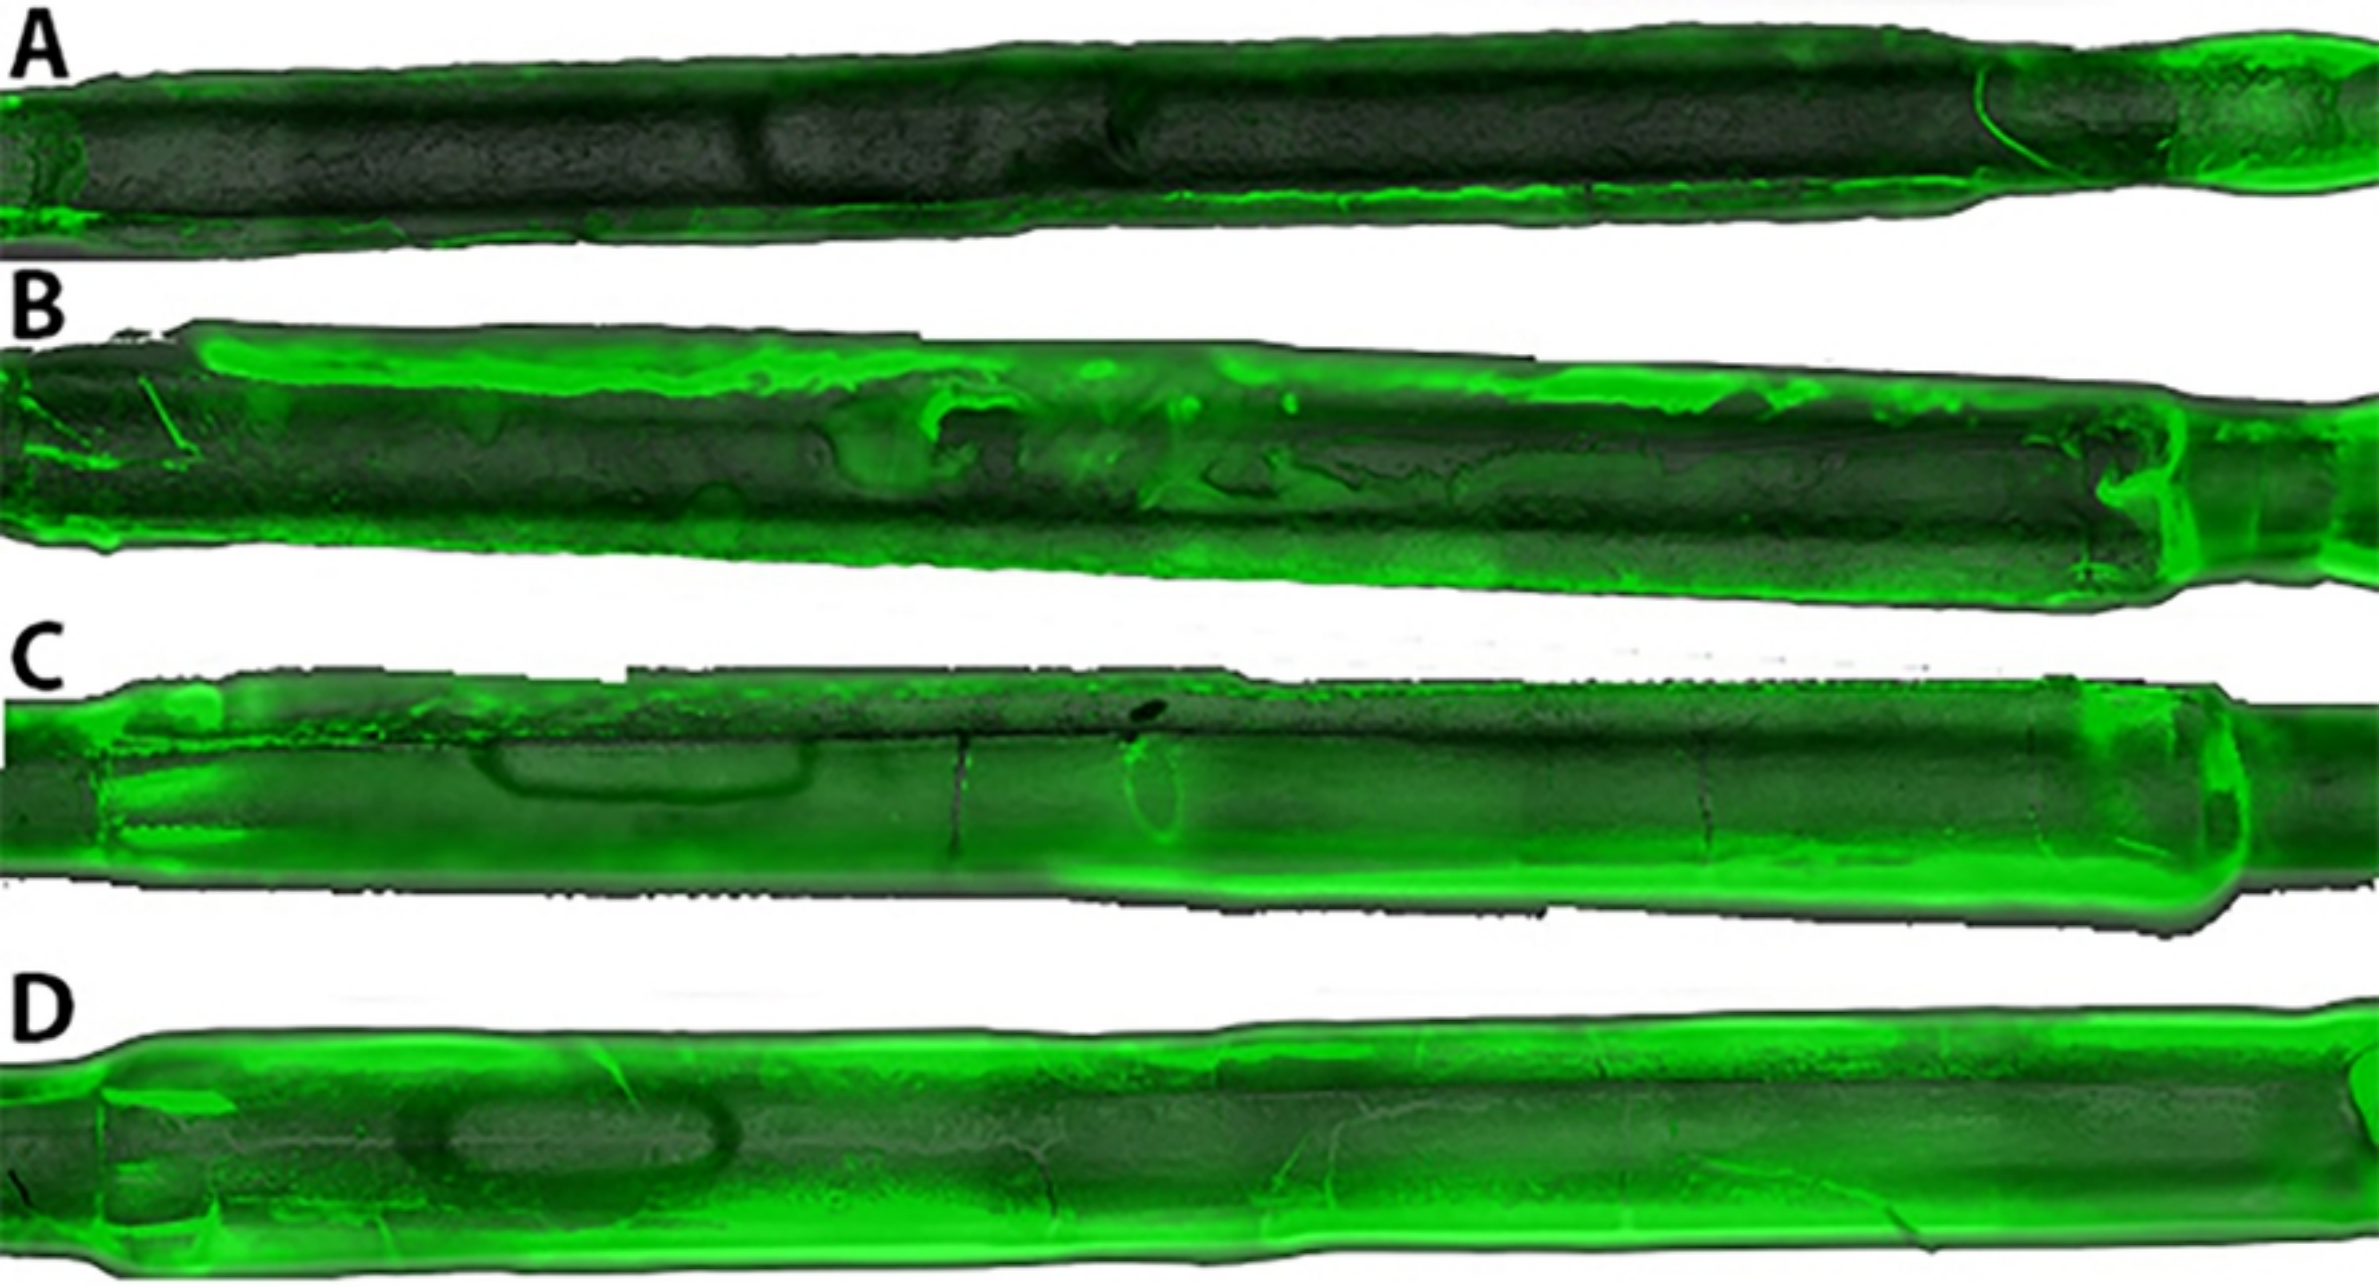

Figure 2

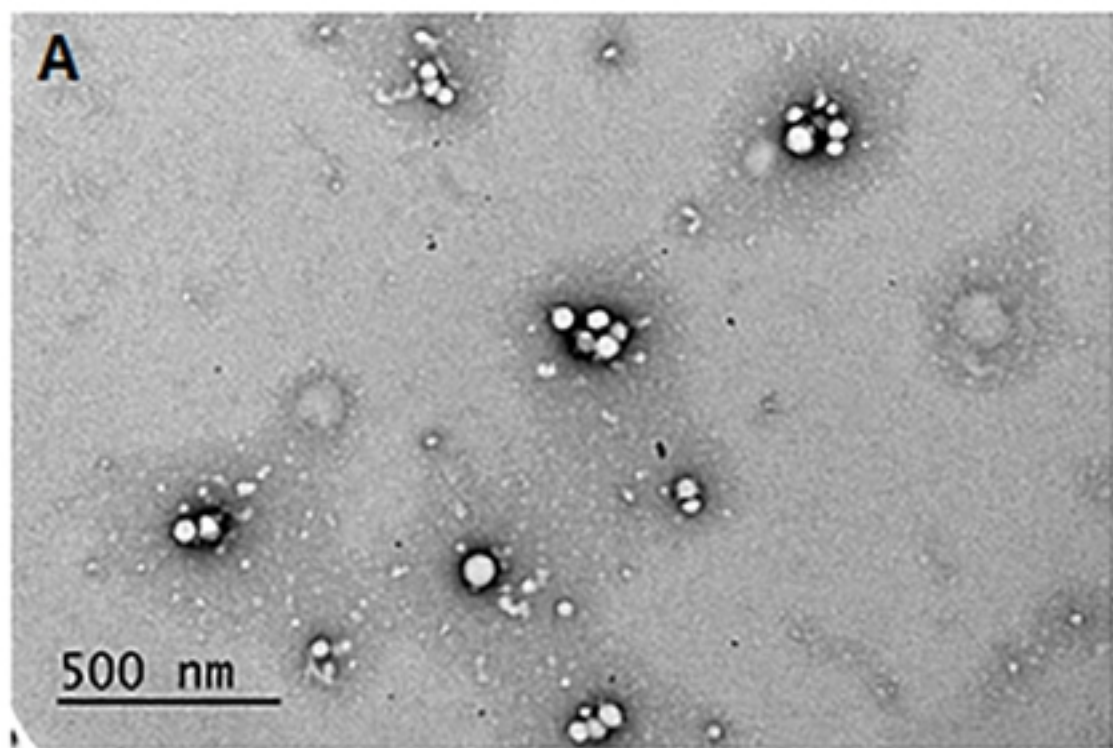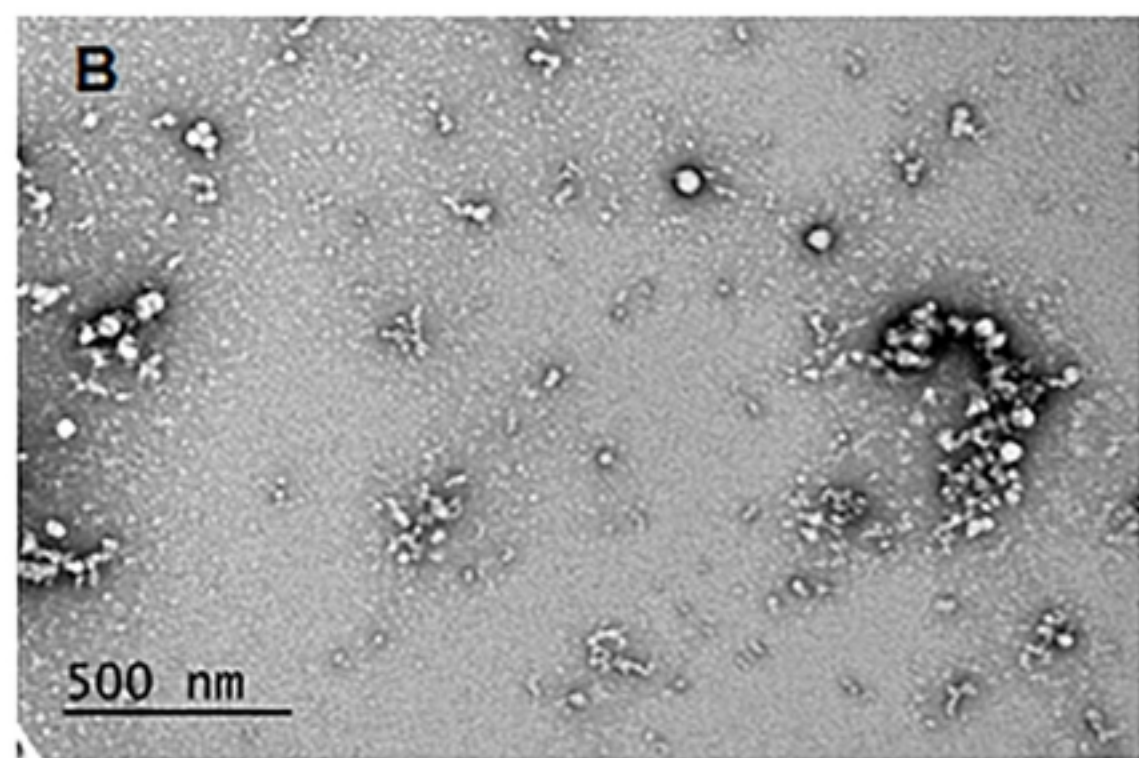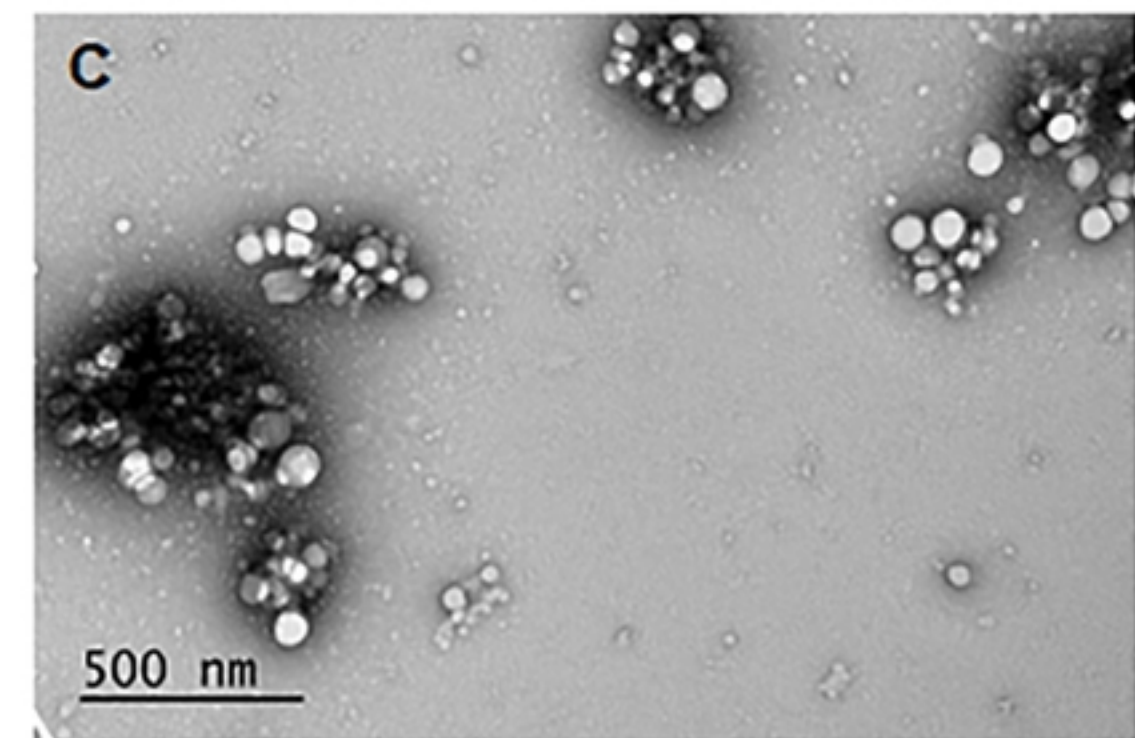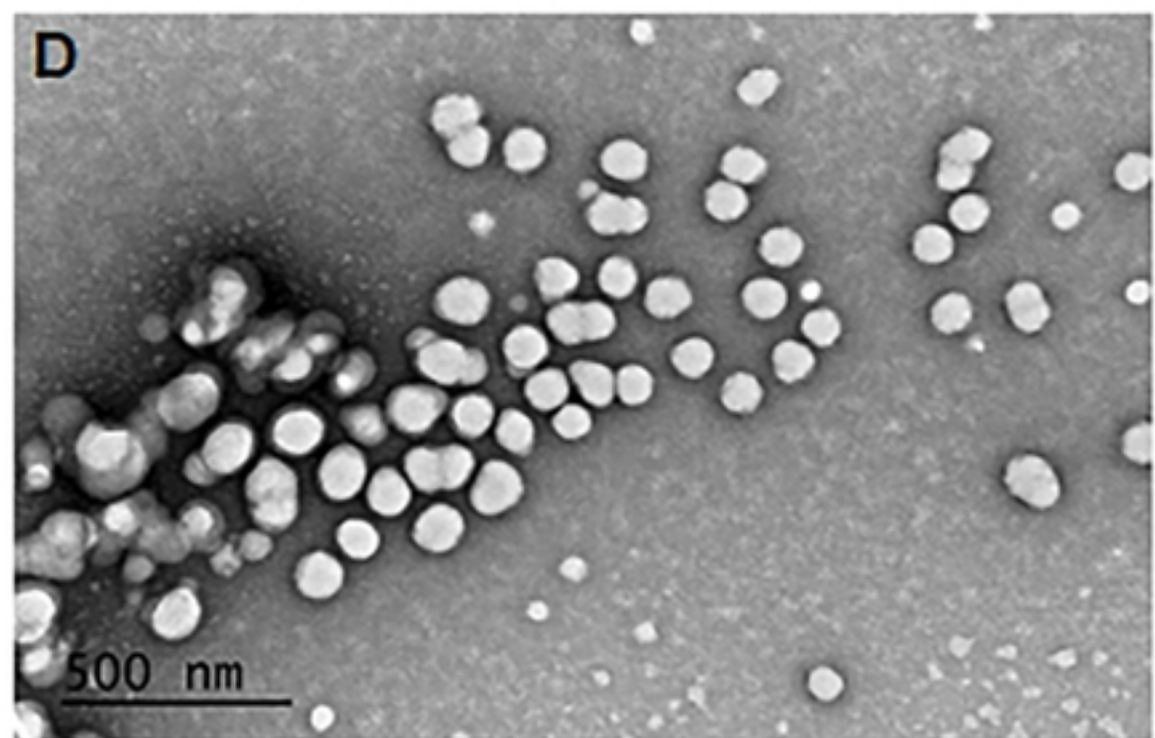

Figure 3

Uncalcified

Calcified

pNP(E)

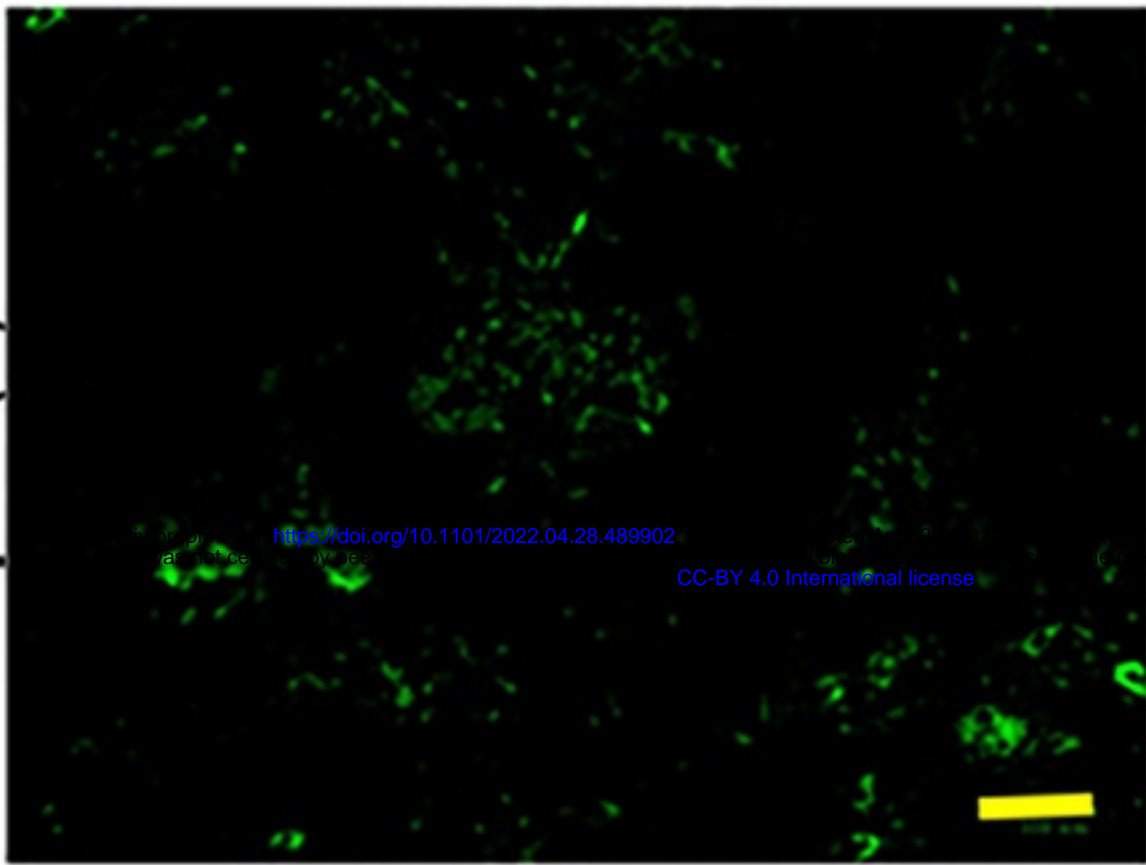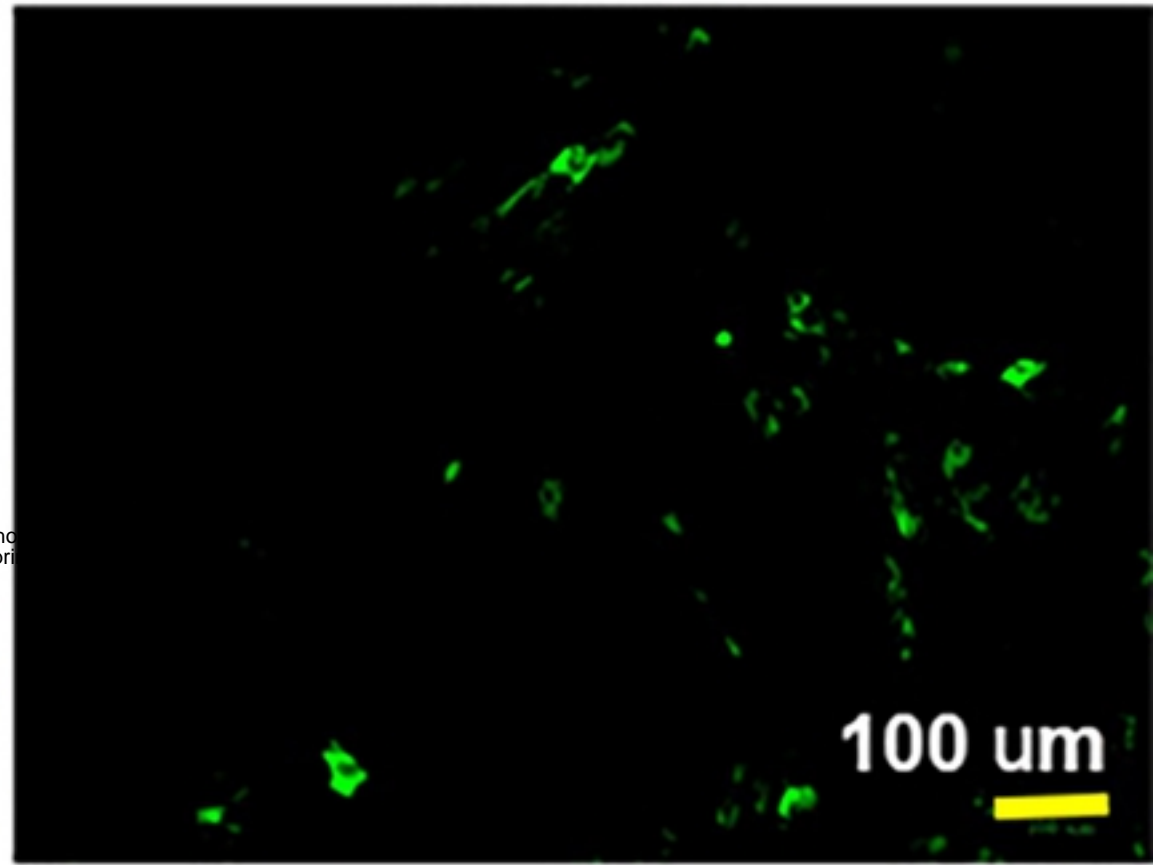

pNP(eQ)

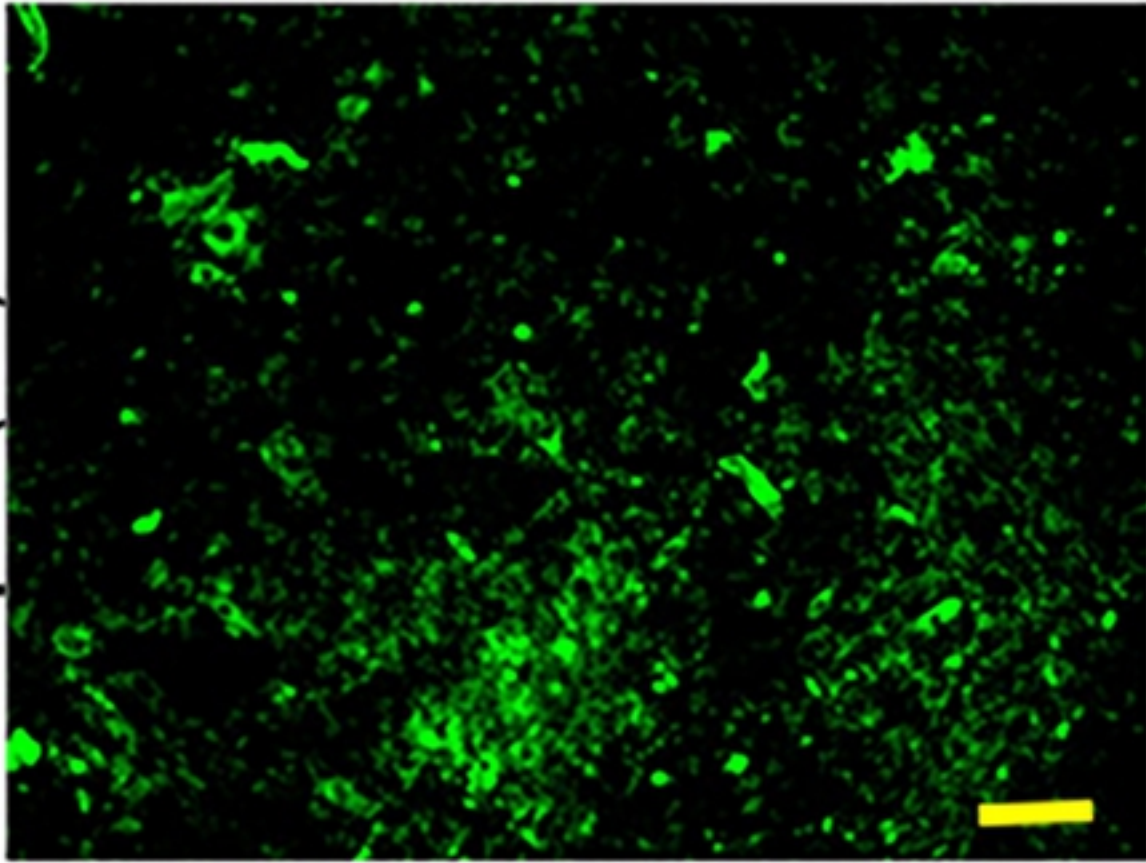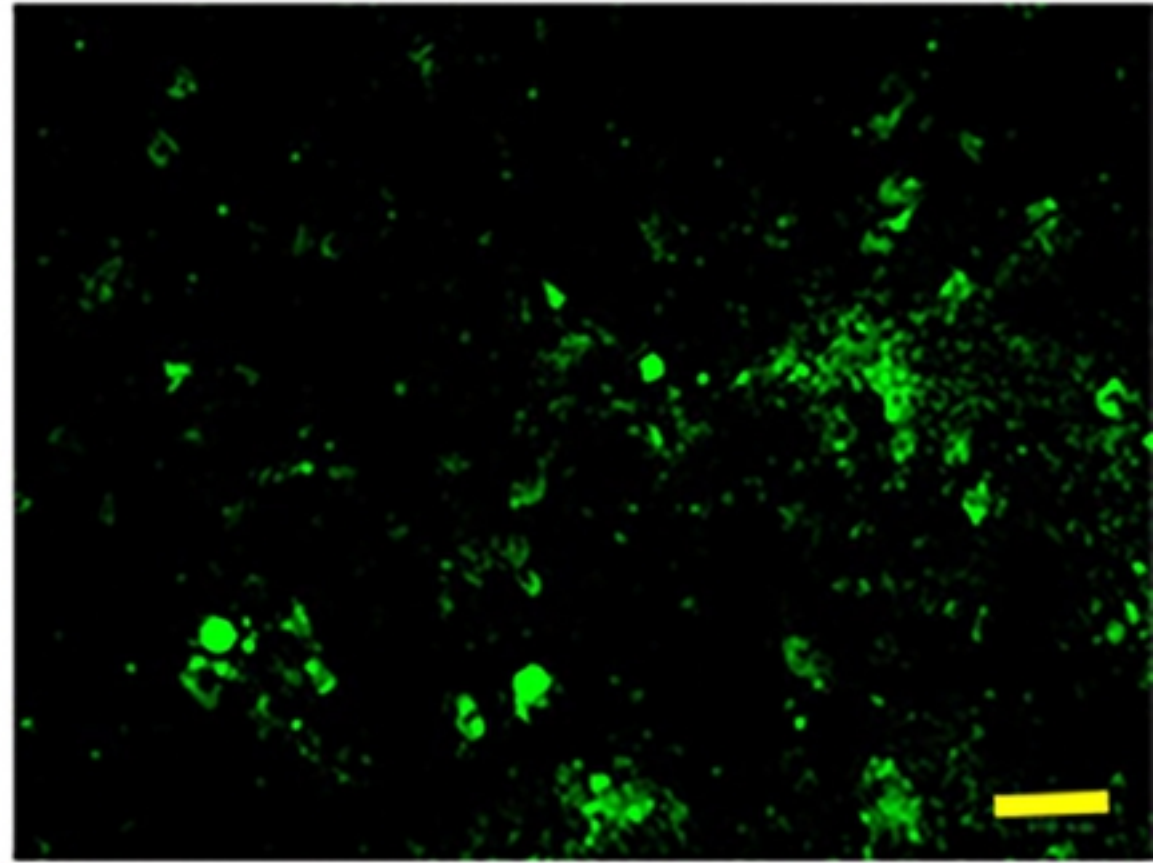

pNP(cQ)

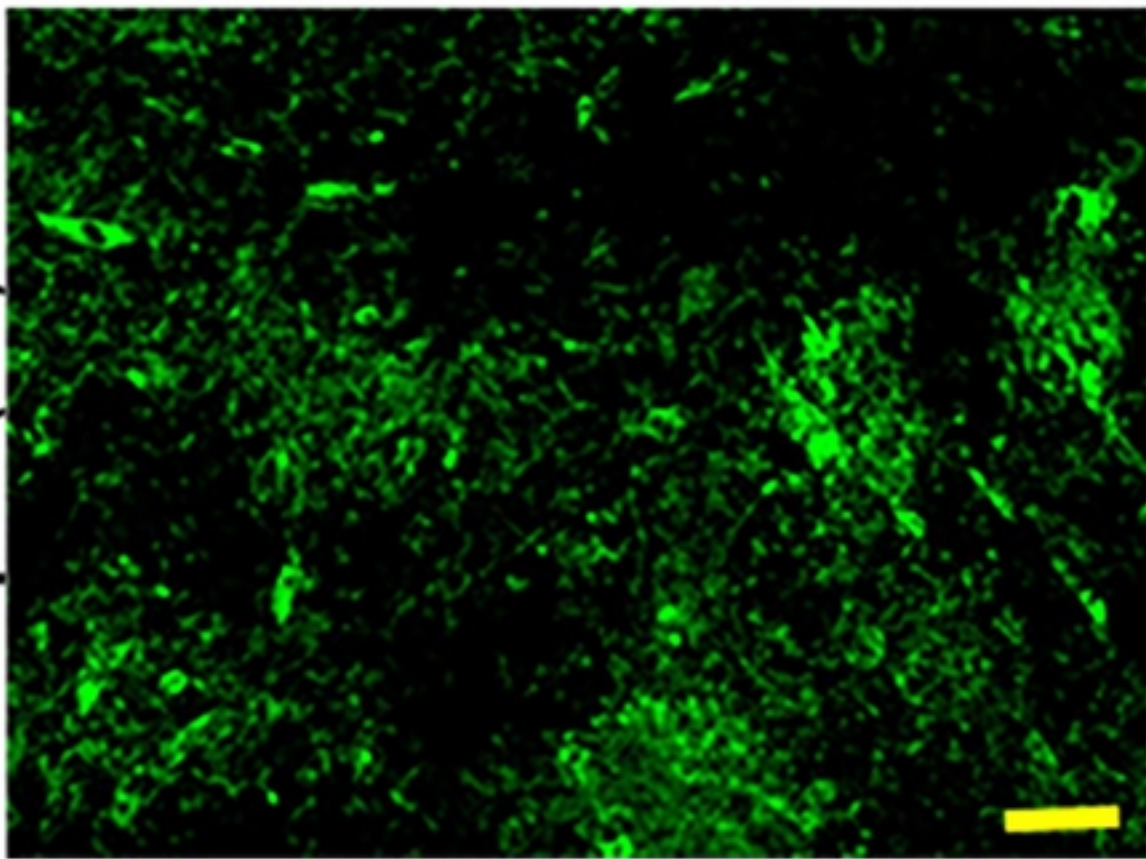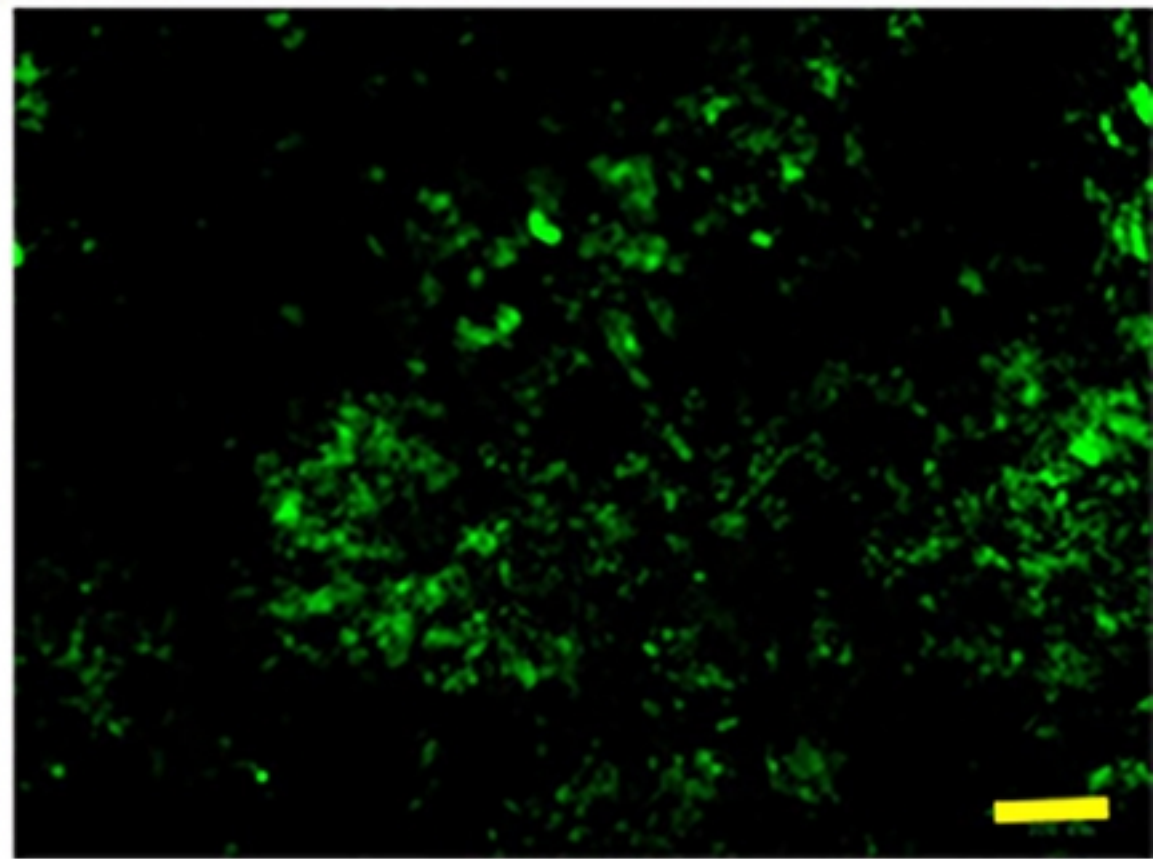

Figure 7

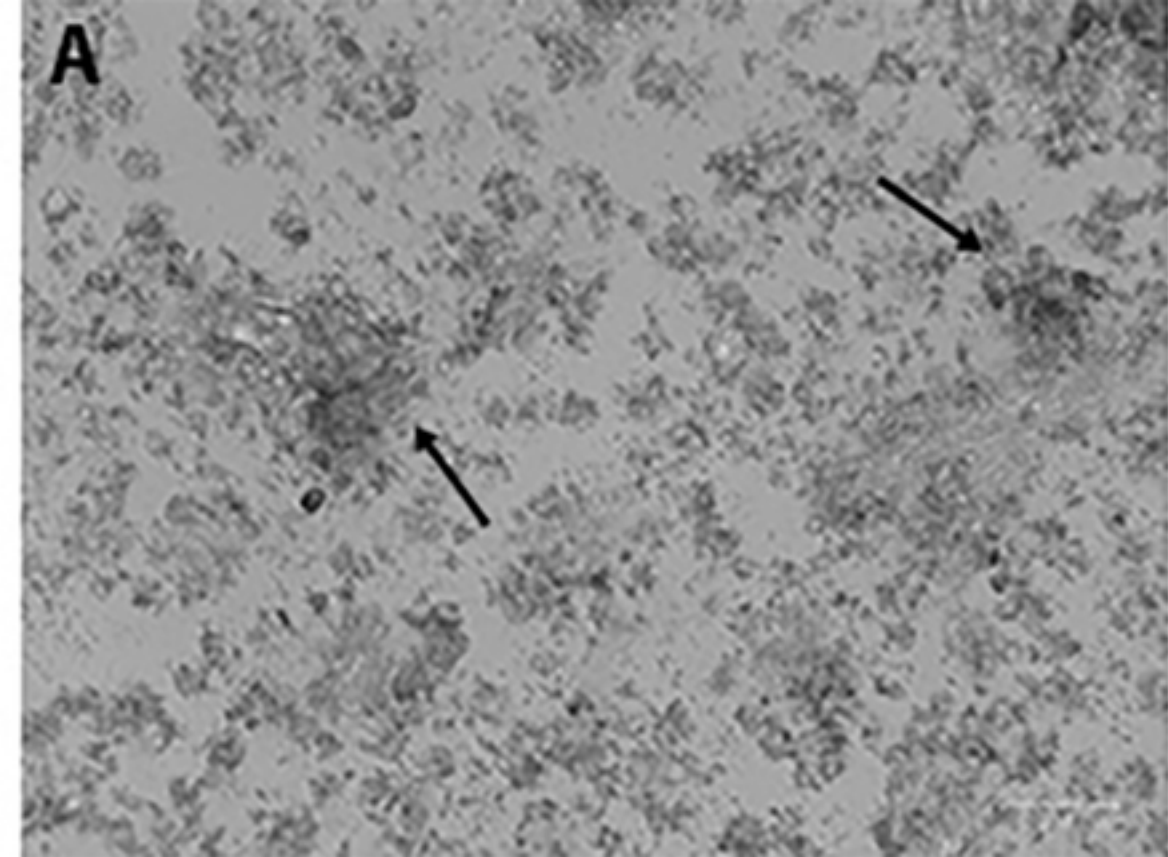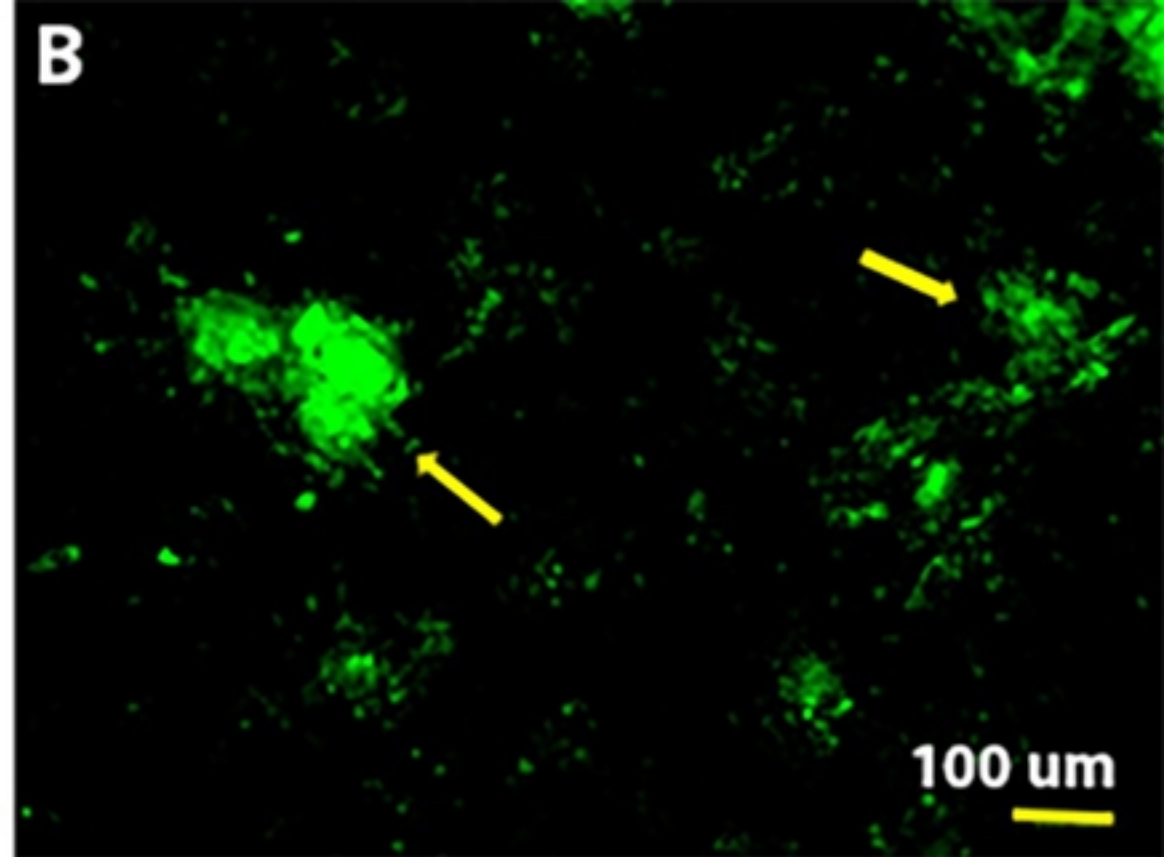

Figure 8

**A**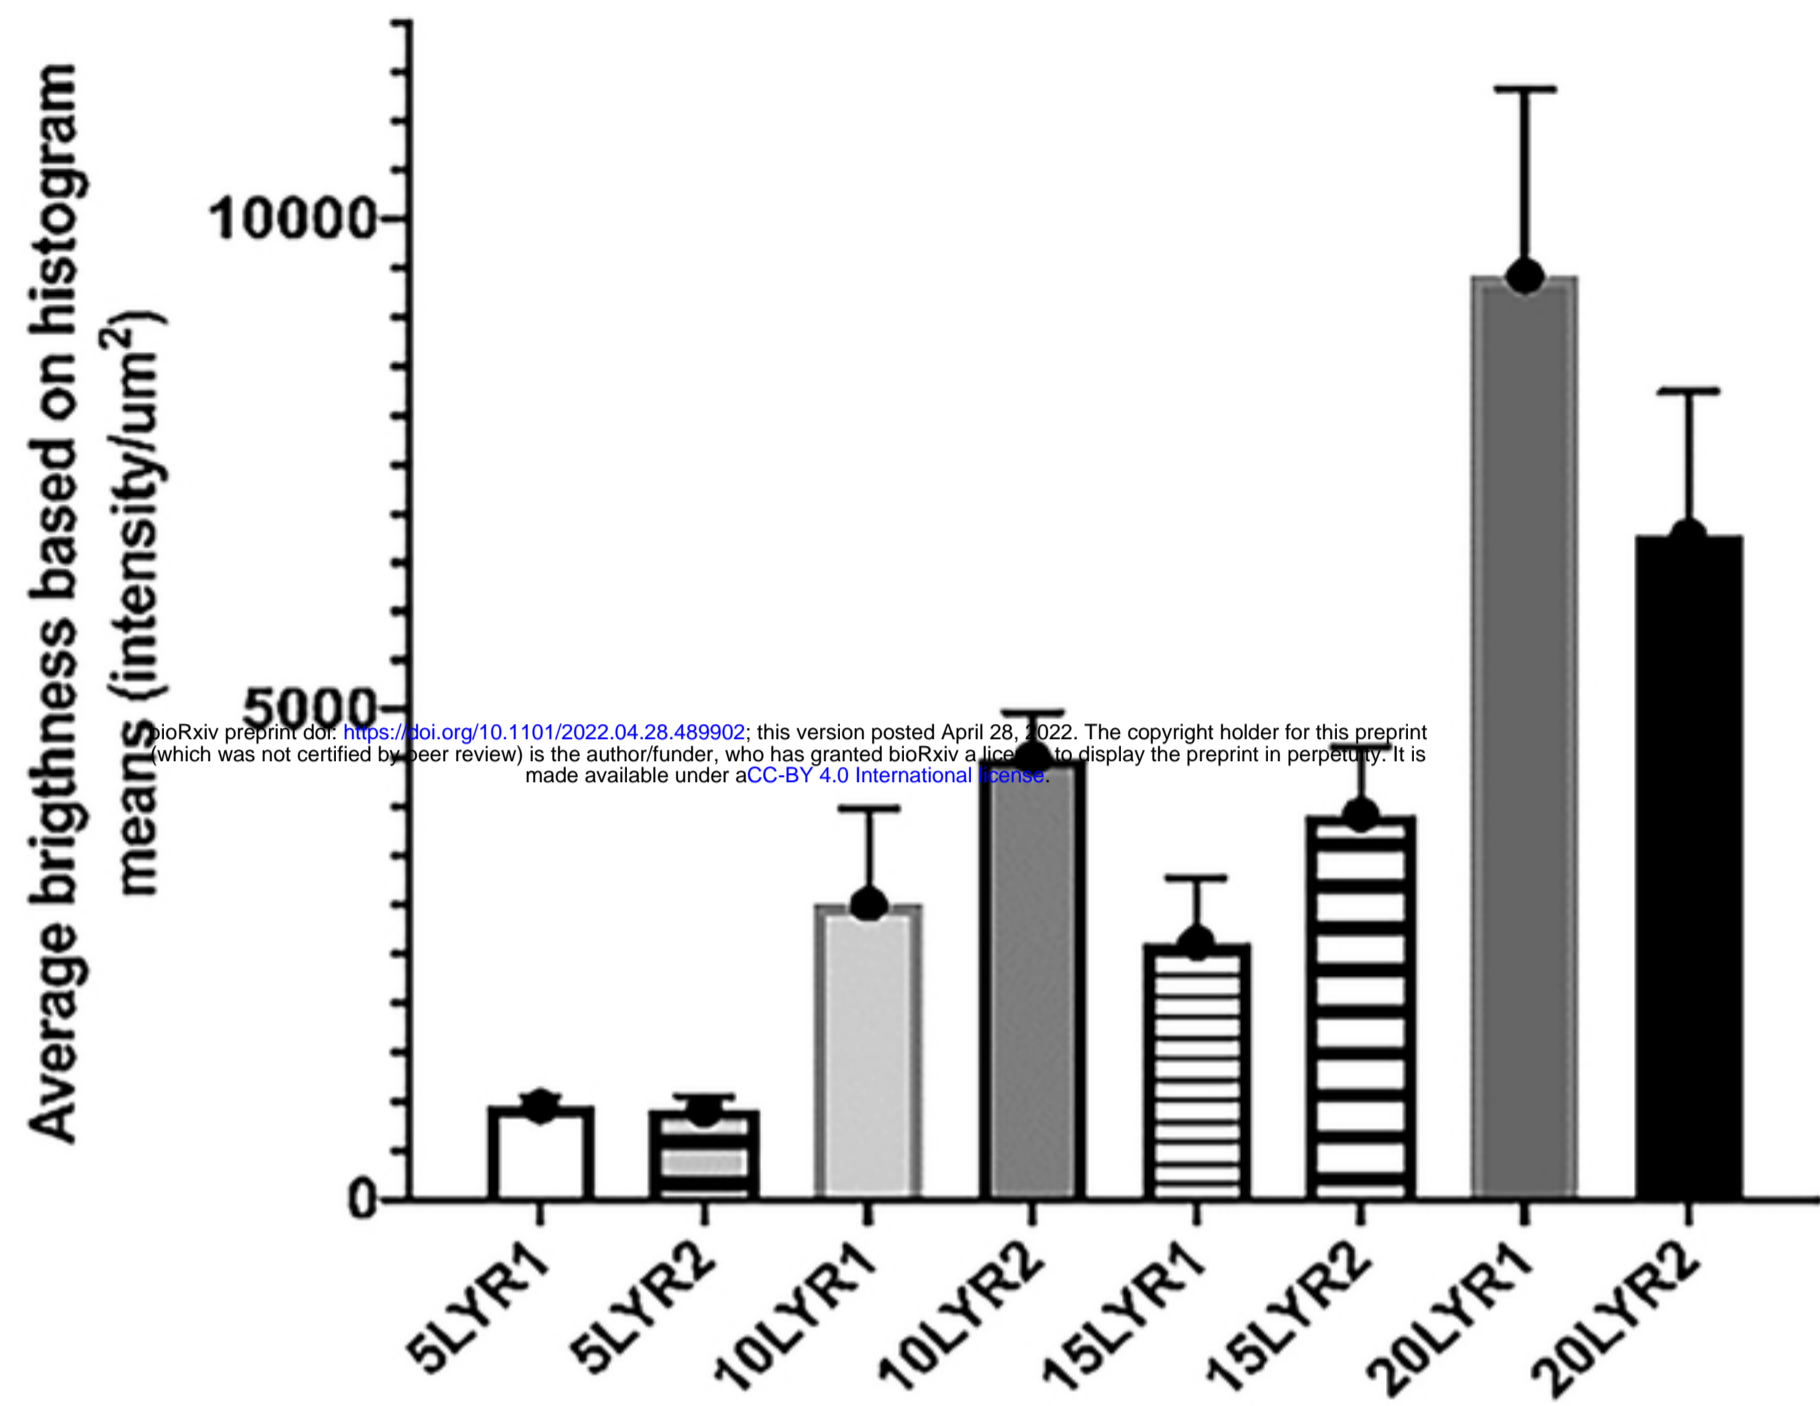**B**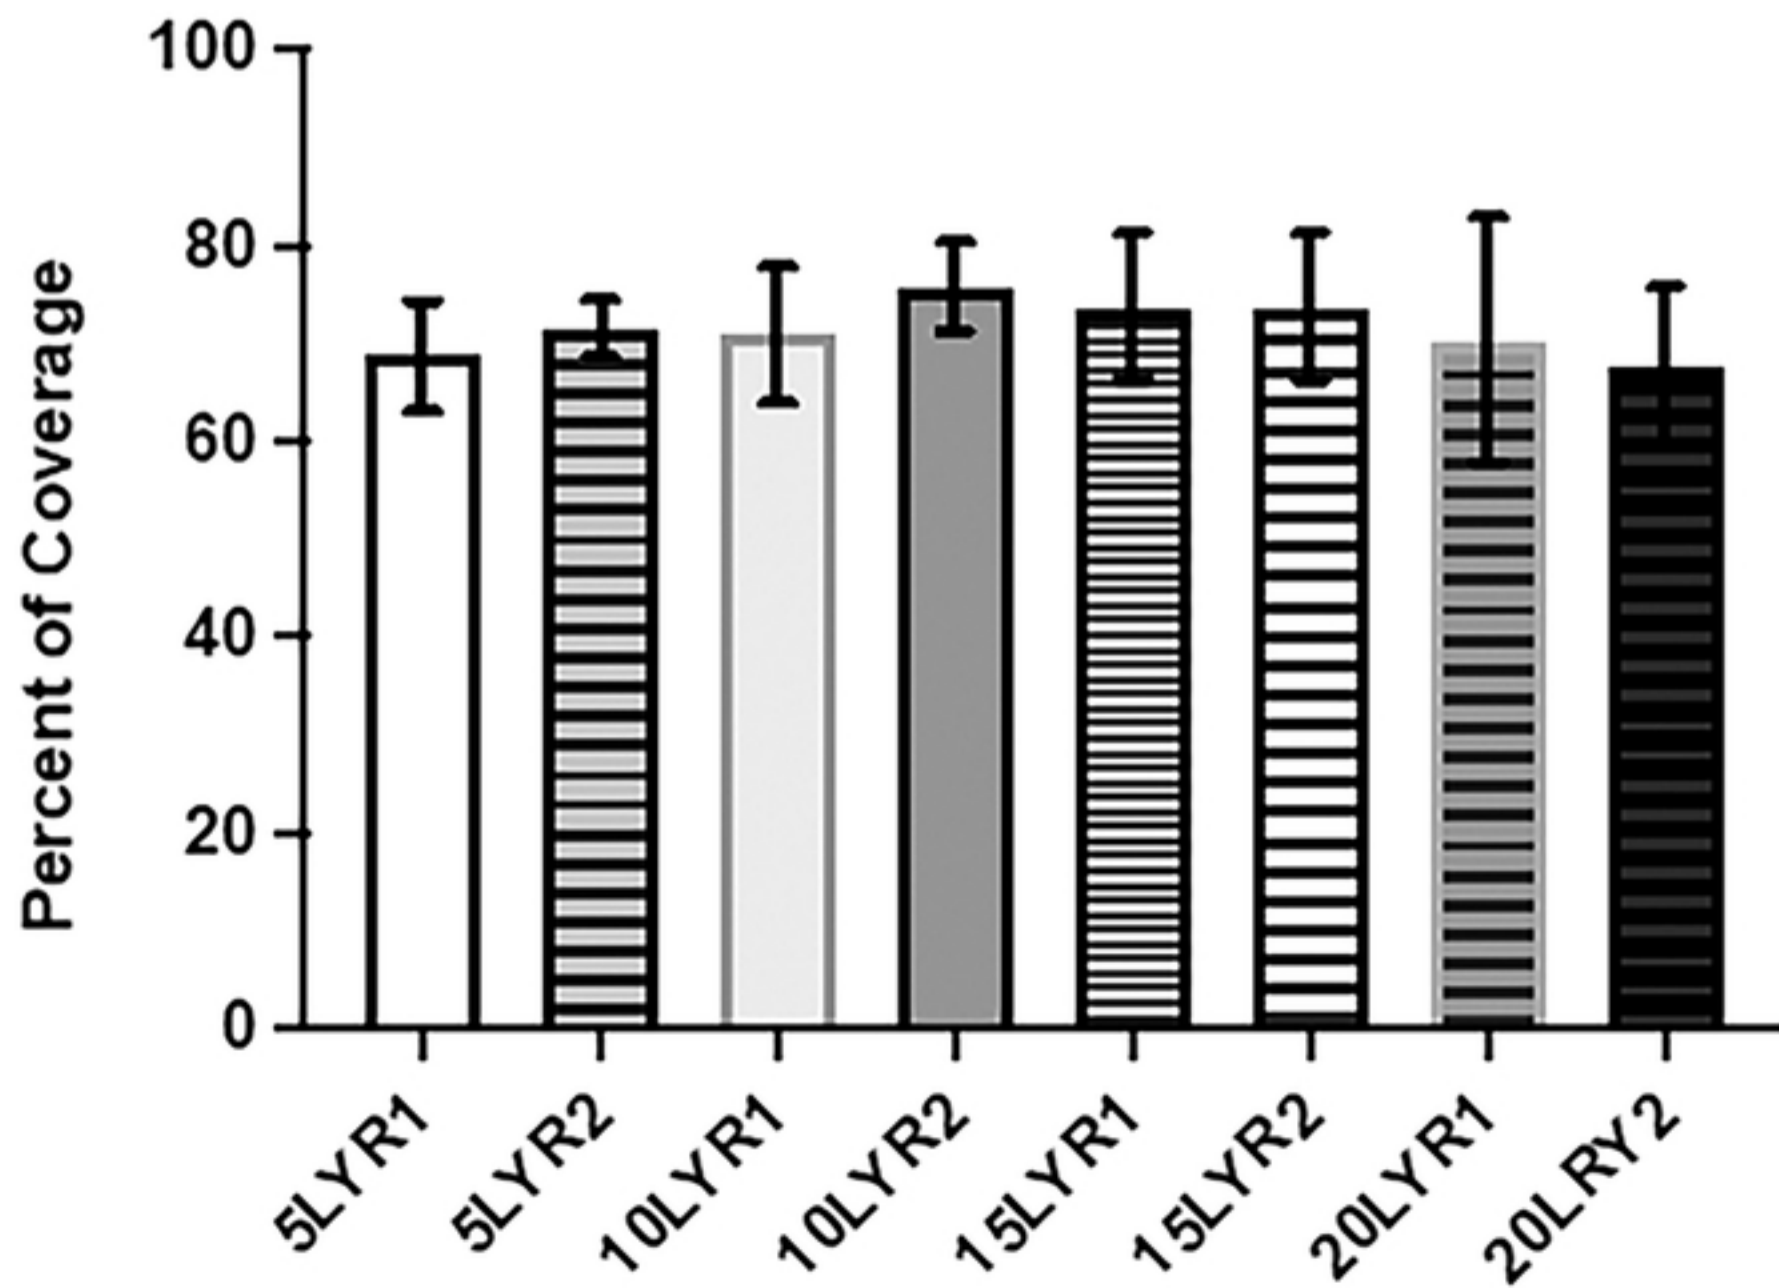

Figure 9

**A**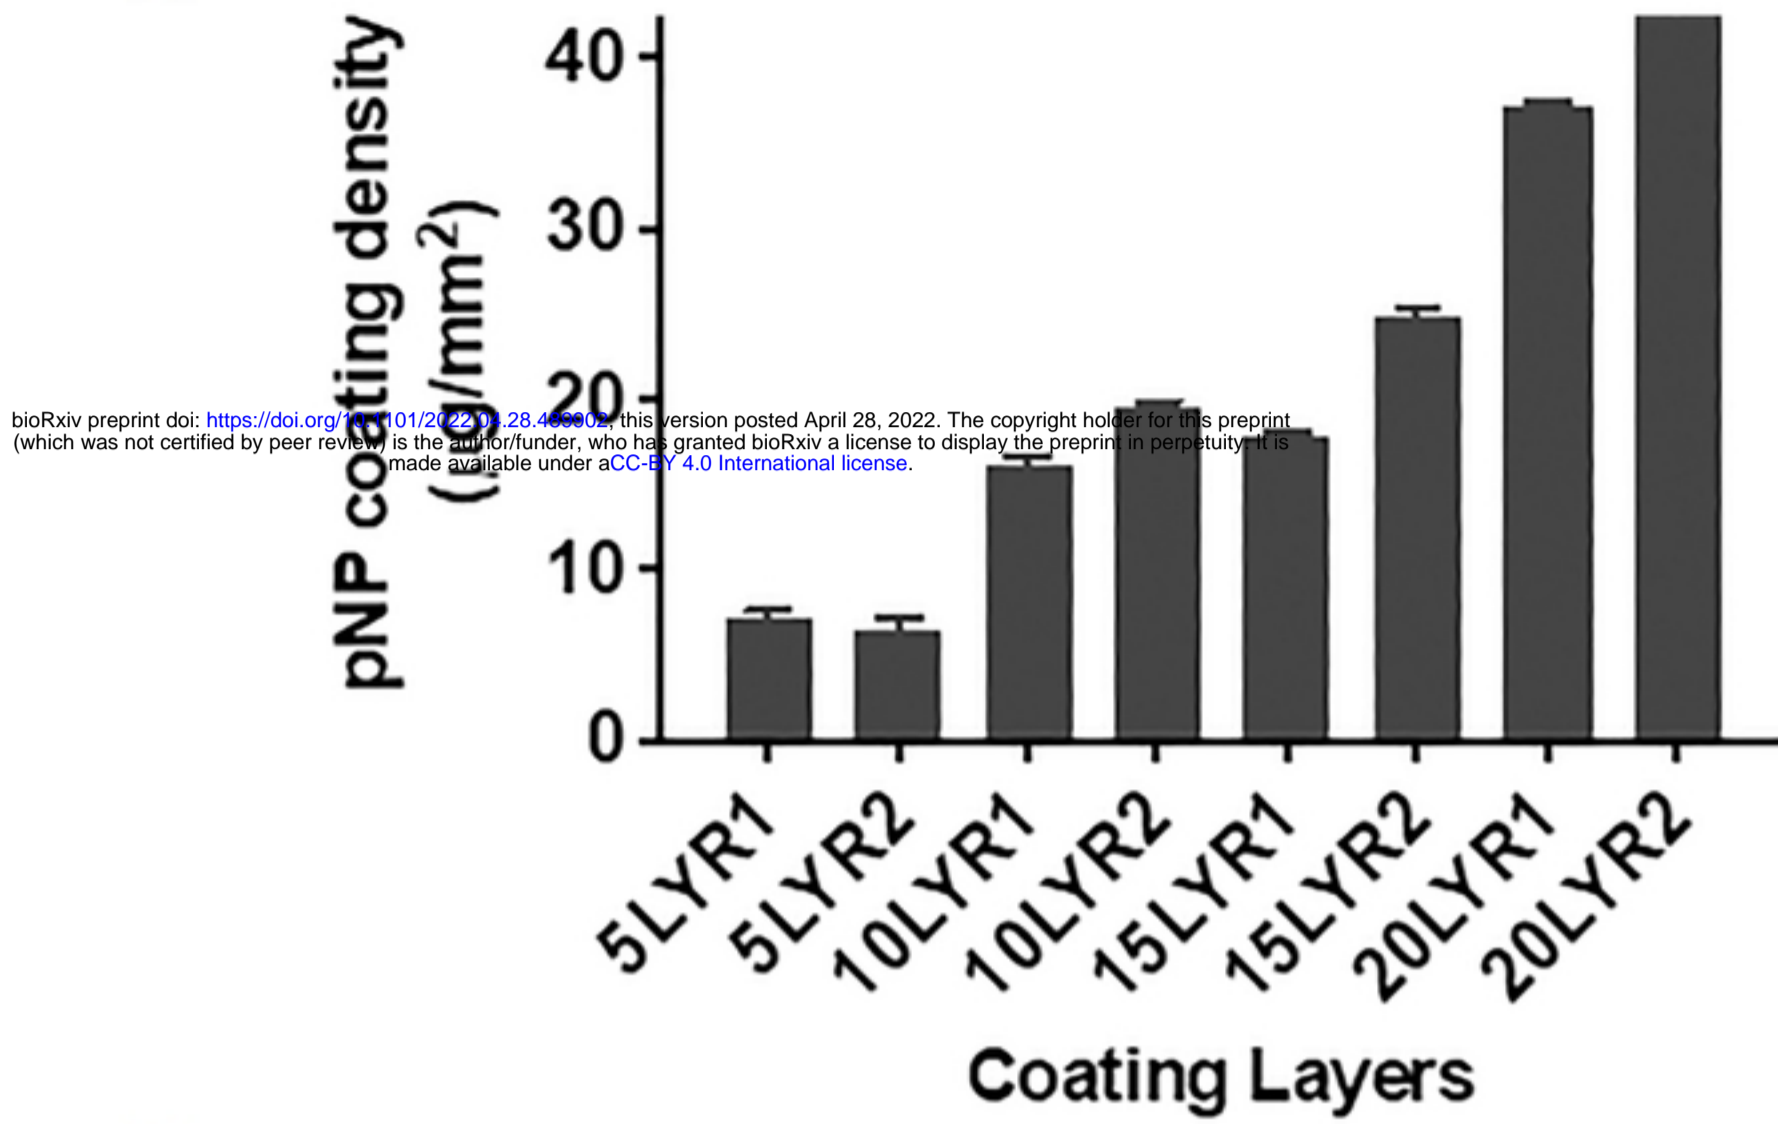**B**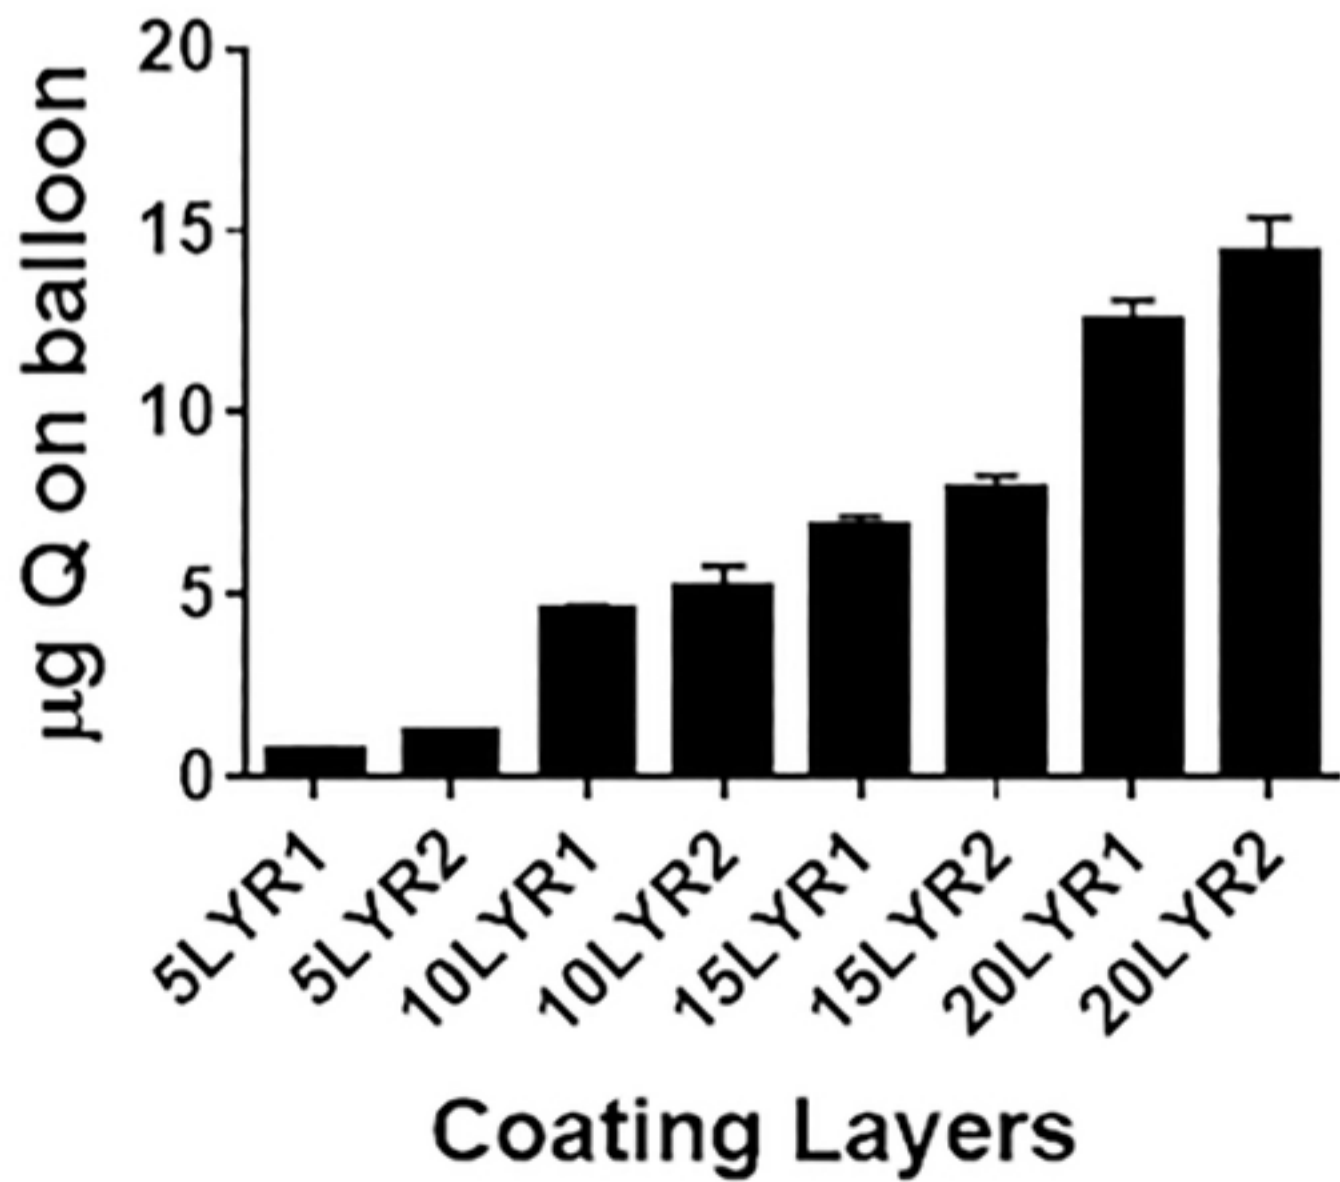

Figure 10

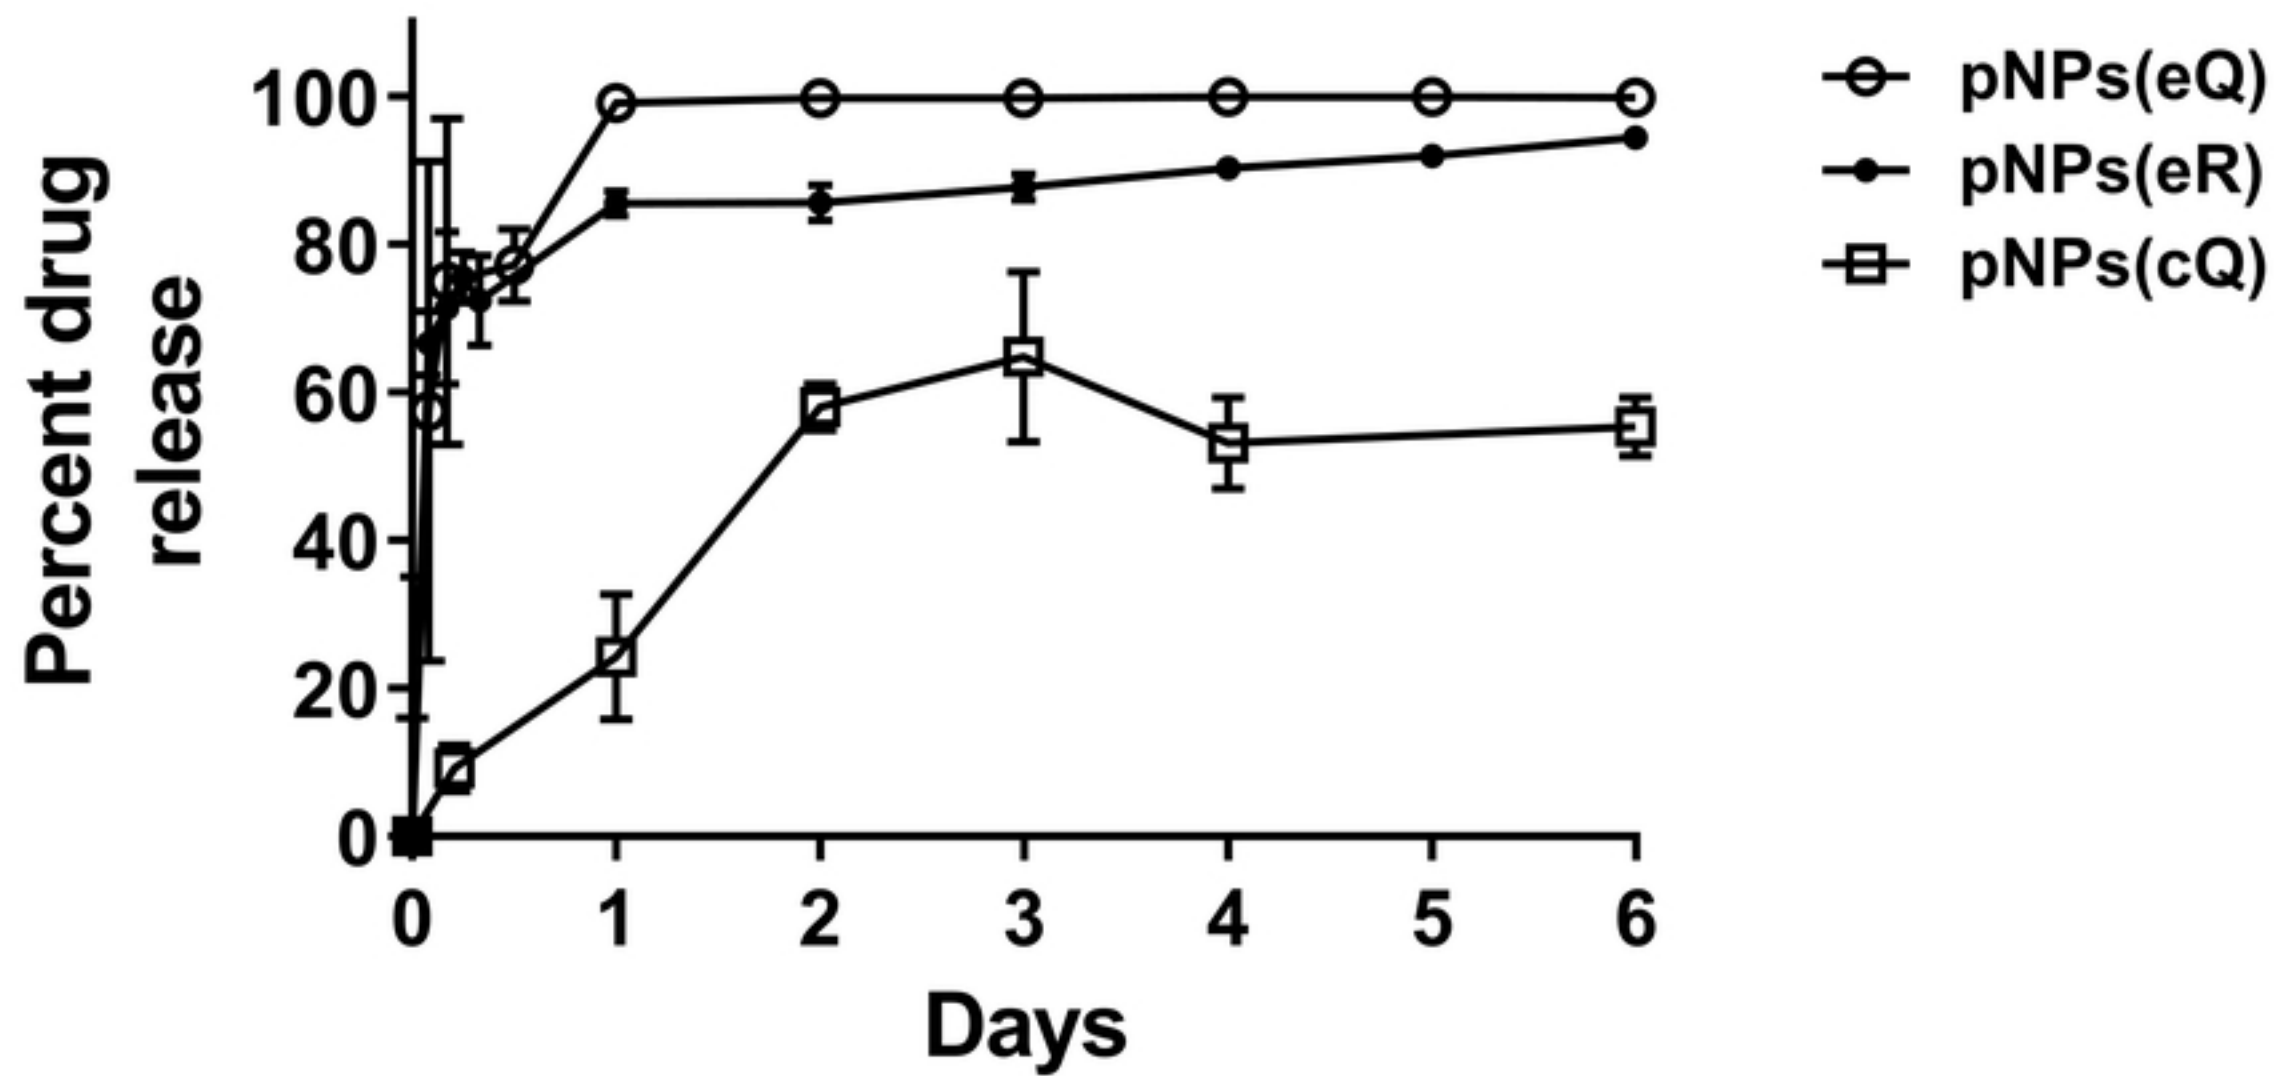

Figure 4



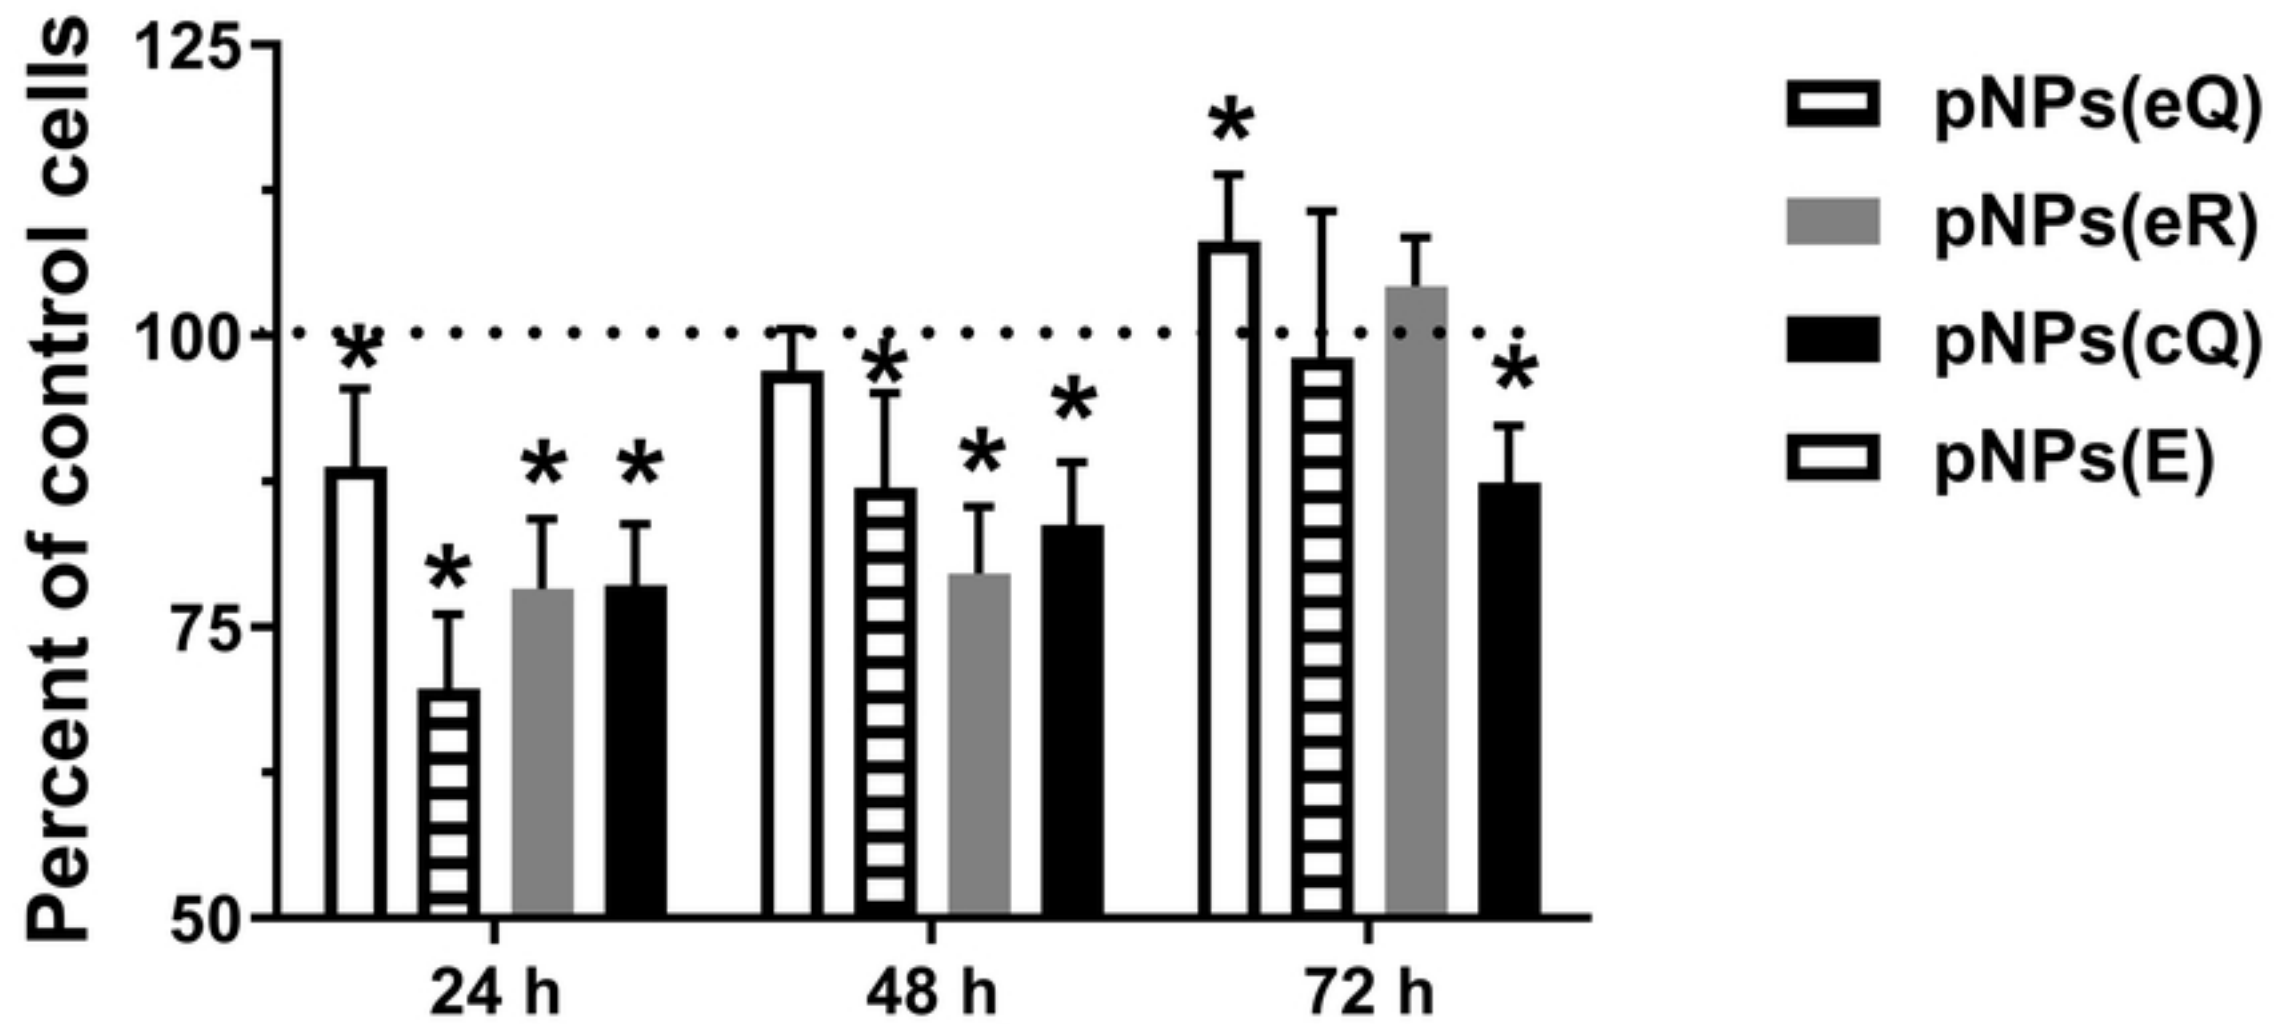

Figure 5

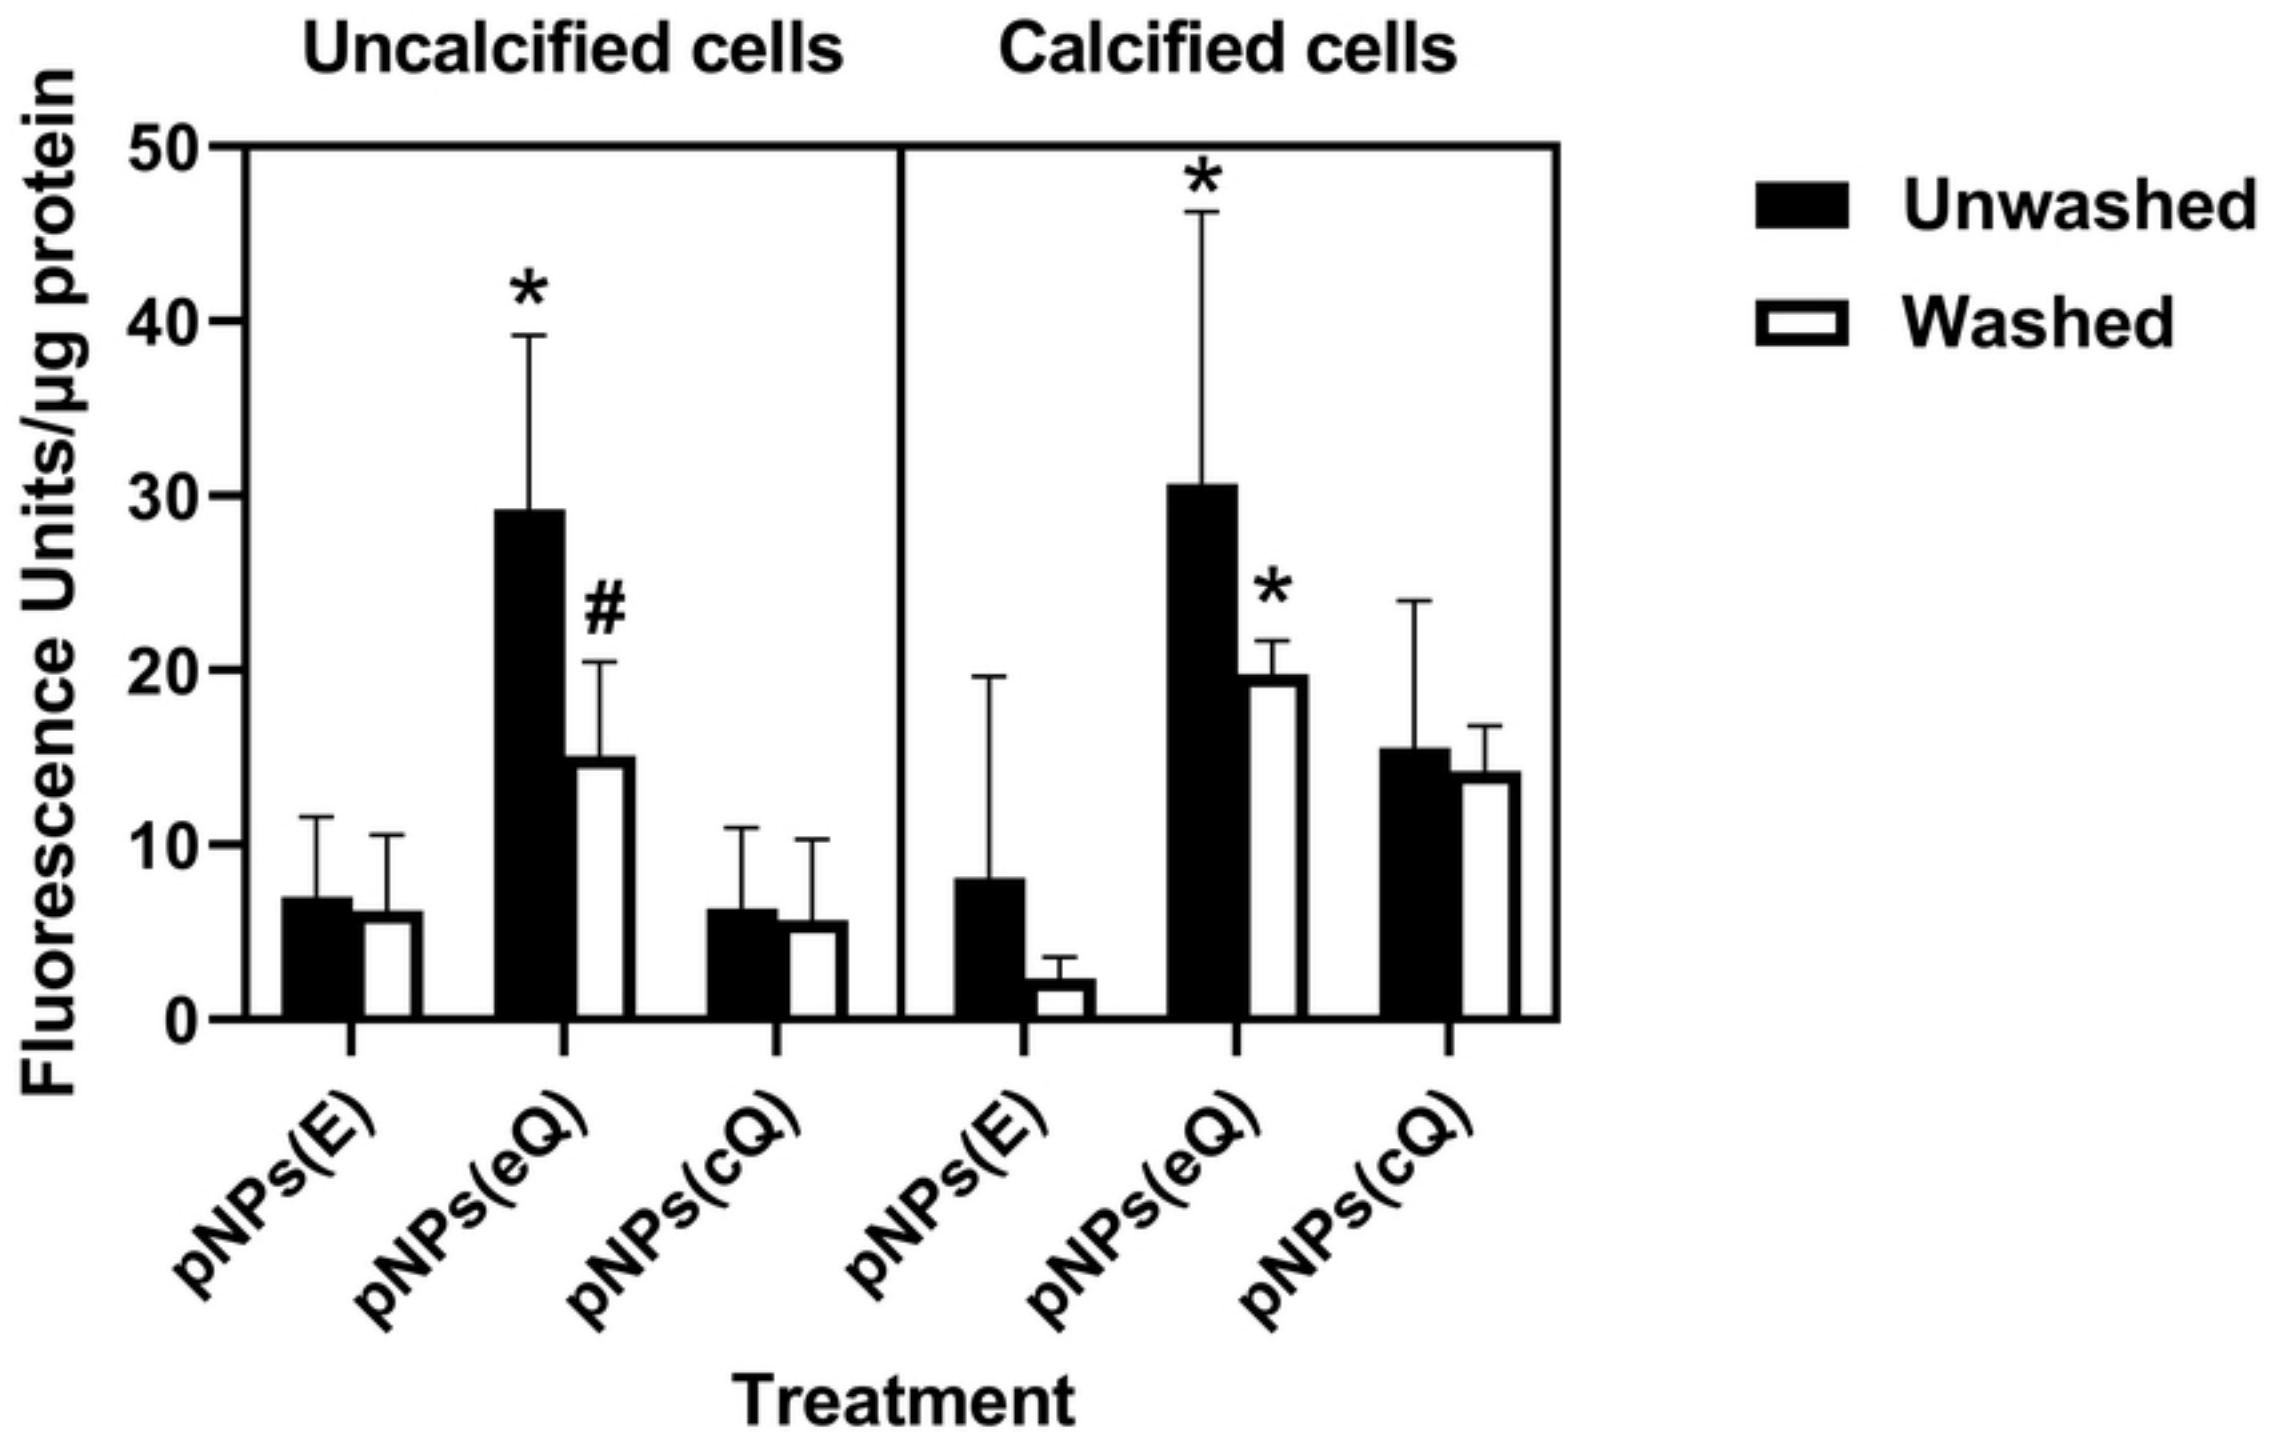

Figure 6
